# Supplementary material for: Towards H2O catalyzed N2-fixation over TiO2 doped Run clusters (n = 5, 6): a mechanistic and kinetic approach
Source: Royal Society of Chemistry journal article supplement (doi:10.1039/d0cp03507f), 2020-11-20
Supplement: d0cp03507f1.pdf [file d0cp03507f1.pdf]

# Supporting information for: Toward the H<sub>2</sub>O catalyzed N<sub>2</sub>-fixation over TiO<sub>2</sub> doped Ru<sub>n</sub> clusters (n=5, 6): a mechanistic and kinetic approach

Sourav Ghoshal,<sup>†</sup> Anup Pramanik,<sup>†,‡</sup> and Pranab Sarkar<sup>\*,†</sup>

*Department of Chemistry, Visva-Bharati University, Santiniketan- 731235, India, and Department  
of Chemistry, Sidho-Kanho-Birsha University, Purulia- 723104, India*

E-mail: pranab.sarkar@visva-bharati.ac.in

## Table of Contents

1. A brief overview of kinetics methodology.
2. Calculated Bader charges over different elements in Ru<sub>6</sub>-TiO<sub>2</sub> cluster.
3. A full potential energy diagram for two H<sub>2</sub>O and H<sub>2</sub> driven N<sub>2</sub> fixation over Ru<sub>5</sub>-TiO<sub>2</sub> cluster in accordance with the distal and alternating-type mechanism..
4. Schematic energy profile of NH<sub>3</sub> formation via hydrogenation of I4A intermediate.
5. Alternating-type mechanism over TiO<sub>2</sub> doped Ru<sub>5</sub> cluster.
6. Enzymatic mechanism over TiO<sub>2</sub> doped Ru<sub>5</sub> cluster.
7. Cartesian coordinates.

---

\*To whom correspondence should be addressed

<sup>†</sup>Visva-Bharati University

<sup>‡</sup>Sidho-Kanho-Birsha University

## S1. Kinetics methodology

The rate constants of elementary reaction steps were computed from conventional transition state theory (TST)<sup>1,2</sup> using Eq. (1).

$$k^{TST}(T) = \Gamma(T) \times \sigma \times \frac{k_b T}{h} \frac{Q^{TS}(T)}{N_A Q^R(T)} e^{-\frac{E^\ddagger}{k_b T}} \quad (1)$$

In Eq. (1),  $\Gamma(T)$ ,  $\sigma$ ,  $k_b$ ,  $T$ ,  $h$ ,  $Q^{TS}$ ,  $Q^R$  and  $E^\ddagger$  are denoted as multiplicative transmission coefficient, reaction path degeneracy, Boltzmann's constant, temperature, Planck's constant, total partition functions of transition state, reactants and zero-point excluded energy difference between the transition state (TS) and reactants (R), respectively. Multiplicative factor is determined by using tunneling treatment based on unsymmetrical Eckart potential energy barrier. To calculate TST rate constant, one just needs the thermodynamic information only for transition state (first-order saddle point) and reactants in the PES. Furthermore,  $k^{TST}(T)$  can also be computed from the standard Gibbs free energy calculation using Eq. (2).

$$k^{TST}(T) = \Gamma(T) \times \sigma \times \frac{k_b T}{h} \left( \frac{RT}{P^0} \right)^{\Delta n} e^{-\frac{\Delta G^{0,\ddagger}(T)}{k_b T}} \quad (2)$$

In Eq. (2),  $\Delta G^{0,\ddagger}(T)$  is denoted as the standard Gibbs free energy of activation. For gas-phase bimolecular or unimolecular reactions  $\Delta n$  belongs to 1 or 0. The reaction path degeneracy  $\sigma$  is calculated from the Eq. (3), in which,  $n^R$  and  $n^\ddagger$  are the number of chiral isomers of the reactant(s) and transition state, respectively, and  $\sigma^R$  and  $\sigma^\ddagger$  are the rotational symmetry numbers.<sup>1,2</sup>

$$\sigma = \frac{n^\ddagger \sigma^R}{n^R \sigma^\ddagger} \quad (3)$$

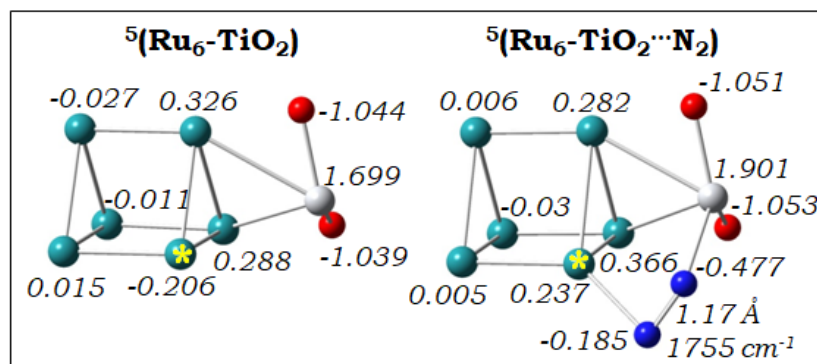

Figure S1: Calculated Bader charges over different elements in N<sub>2</sub> free and adsorbed TiO<sub>2</sub> doped Ru<sub>6</sub> cluster.

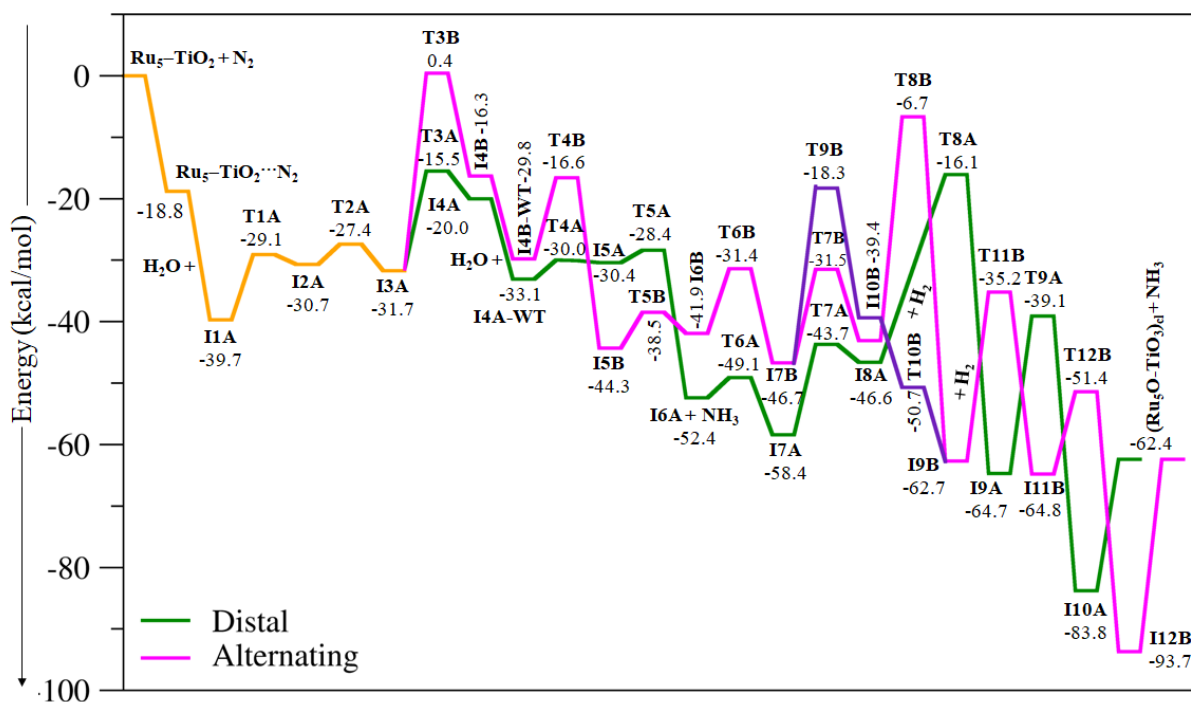

Figure S2: Schematic potential energy diagram for two H<sub>2</sub>O and H<sub>2</sub> driven N<sub>2</sub> fixation over TiO<sub>2</sub> doped Ru<sub>5</sub> cluster in accordance with the distal and alternating-type mechanism.

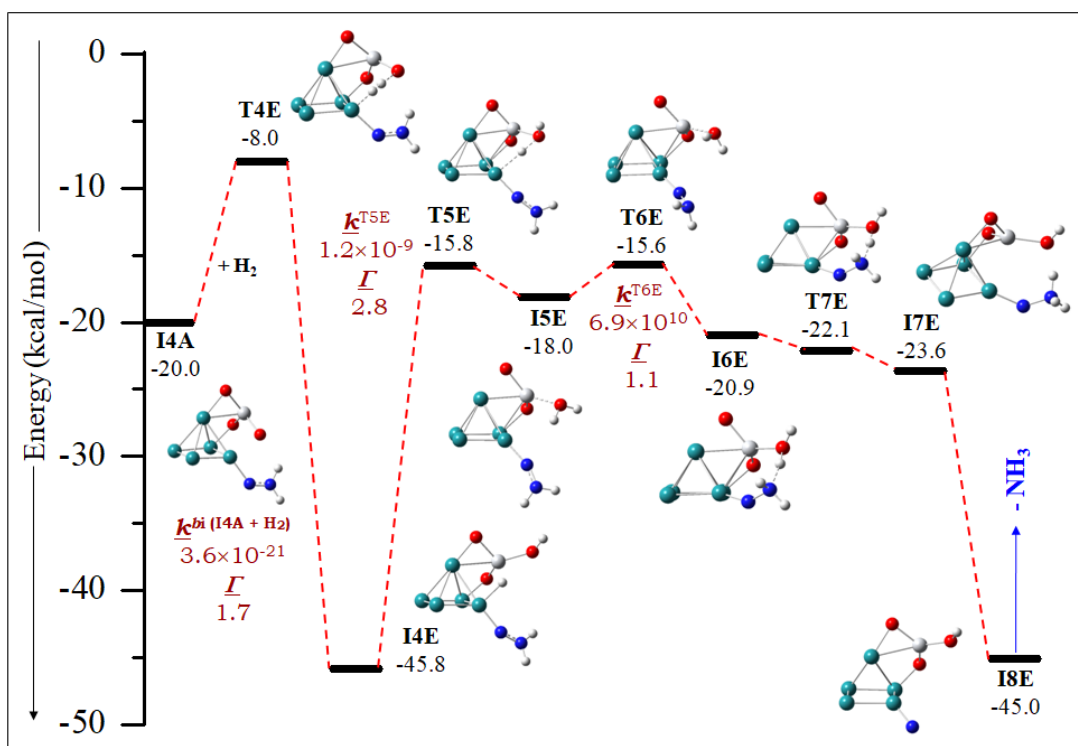

Figure S3: ZPE-corrected B3LYP/def2-TZVP level calculated potential energy diagram for NH<sub>3</sub> formation via hydrogenation of I4A. 1st ( $k$ , sec<sup>-1</sup>) and 2nd ( $k^{bi}$ , cm<sup>3</sup>/molecule/sec) order rate coefficients of various elementary hydrogenation steps along with tunneling correction ( $\Gamma$ ) have also been supplied in the figure.

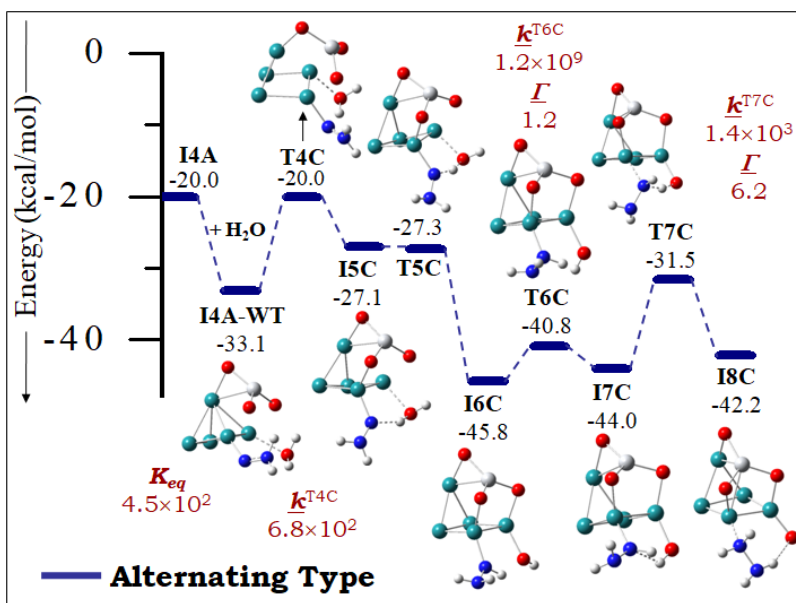

Figure S4: ZPE-corrected B3LYP/def2-TZVP level calculated potential energy diagram for  $\text{N}_2$  to  $\text{N}_2\text{H}_4$  conversion followed by alternating-type mechanism. 1st order rate constant ( $k$ ,  $\text{sec}^{-1}$ ) of various unimolecular steps along with tunneling correction ( $\Gamma$ ) and equilibrium constant of complexes ( $K_{eq}$ ,  $\text{atm}^{-1}$ ) have also been supplied in the figure.

## S2. Alternating-type mechanism over $\text{TiO}_2$ doped $\text{Ru}_5$ cluster

Aside a pure alternating mechanism discussed in the main text, fixation of  $\text{N}_2$  into hydrazine could have also been possible via  $\text{I4A} + \text{H}_2\text{O}$  capture reaction, which follows somewhat different protocol than the typical hydrogenation sequence of conventional alternating mechanism. In typical alternating mechanism, sequential hydrogenation of two end-on N atoms are occurred alternatively. However,  $\text{I4A}$  is seen to be formed through consecutive hydrogenation of terminal N atom of the end-on adsorbed  $^*\text{N}_2$  molecule. Thus, the present mechanism is denoted by ‘Alternating Type’. Starting from  $\text{I4A-WT}$ , formation of hydrazine could also be viable via four elementary reaction steps, as shown in Figure S4. In  $\text{I4A-WT}$ , H of  $^*\text{H}_2\text{O}$  is closer to the terminal N of  $^*\text{N-NH}_2$ . An immediate geometrical reorganization is necessary to make a room for  $^*\text{HOH}\cdots^*\text{N-NH}_2$  interaction within  $\text{I5C}$  intermediate. For this,  $\text{NH}_2$  group is rotated around N-N-Ru-Ru dihedral by  $110^\circ$  in anticlockwise direction. Rotational barrier is calculated as 13.1 kcal/mol. In the next steps,  $\text{I5C}$  passes through a barrierless pathway and accepts a H from adjacent  $^*\text{H}_2\text{O}$  to form  $^*\text{N}_2\text{H}_3$  moiety

in I6C intermediate, which finally generates  $*N_2H_4$  in I8C intermediate via two consecutive unimolecular steps through transition structures T6C and T7C. Barrier heights of the last two steps are calculated as 5 and 12.5 kcal/mol. Analysis of individual unimolecular rate constant suggests that the first step is the RDS for hydrazine formation. Overall 2nd order rate coefficient of water driven  $I4A \rightarrow N_2H_4$  conversion is calculated as  $\sim 10^{-14}$  cm<sup>3</sup>/molecule/sec, which is found to be two fold higher than that of pure alternating mechanism, as presented in the Figure 6 of main text.

### S3. Enzymatic mechanism over TiO<sub>2</sub> doped Ru<sub>5</sub> cluster

Next, we demonstrate the elementary reactions of enzymatic mechanism, in which two N atoms of side-on N<sub>2</sub> ( $*N*N$ ) are hydrogenated alternately. Basically, alternating and enzymatic mechanisms differ from each other with respect to their different N<sub>2</sub> binding patterns.<sup>3</sup> To explore the enzymatic NRR over Ru<sub>5</sub>-TiO<sub>2</sub> cluster, here, we assume that two  $*H_2O$  molecules attack  $*N*N$  simultaneously (see Figure S5). Sequential adsorption of two water on Ti and Ru atoms of Ru<sub>5</sub>-TiO<sub>2</sub> yields I1D intermediate in the entrance channel. In the first three elementary steps,  $*N*N$  (I1D) is gradually converted into side-on  $*NH*NH$  (I4D) through consecutive reduction by two adjacent  $*H_2O$  molecules. This conversion goes on through T1D, T2D and T3D transition structures, with calculated energy barriers 9.3, 26.6 and 22.6 kcal/mol, respectively. Second unimolecular step containing T2D is found to be the RDS for diazene formation, with computed 1st order rate coefficient  $2 \times 10^{-7}$  sec<sup>-1</sup>. In comparison to the alternating mechanism, relative kinetics analysis suggests that formation rate coefficient of I4D is 4 orders of magnitude higher than that of I4B. This indicates that the side-on  $*NH*NH$  formation is more favourable than that of end-on  $*N_2H_2$ .  $*NH*NH$  is gradually converted into  $*NH_2*NH_2$  in the next five elementary steps. For this,  $*NH*NH$  of I4D is reduced by adjacent  $*OH$  groups to form I9D and the reaction passes through transition structures T4D, T5D, T6D, T7D and T8D with energy barriers 2.0, 17.1, 4.0, 30.8 and 26.1 kcal/mol, respectively. The first two TS correspond to the geometrical isomerization of  $I4D \rightarrow I5D \rightarrow I6D$  conversion via  $*OH$  bond rotation; on the other hand, the last three TSs correspond to the reduction of two N

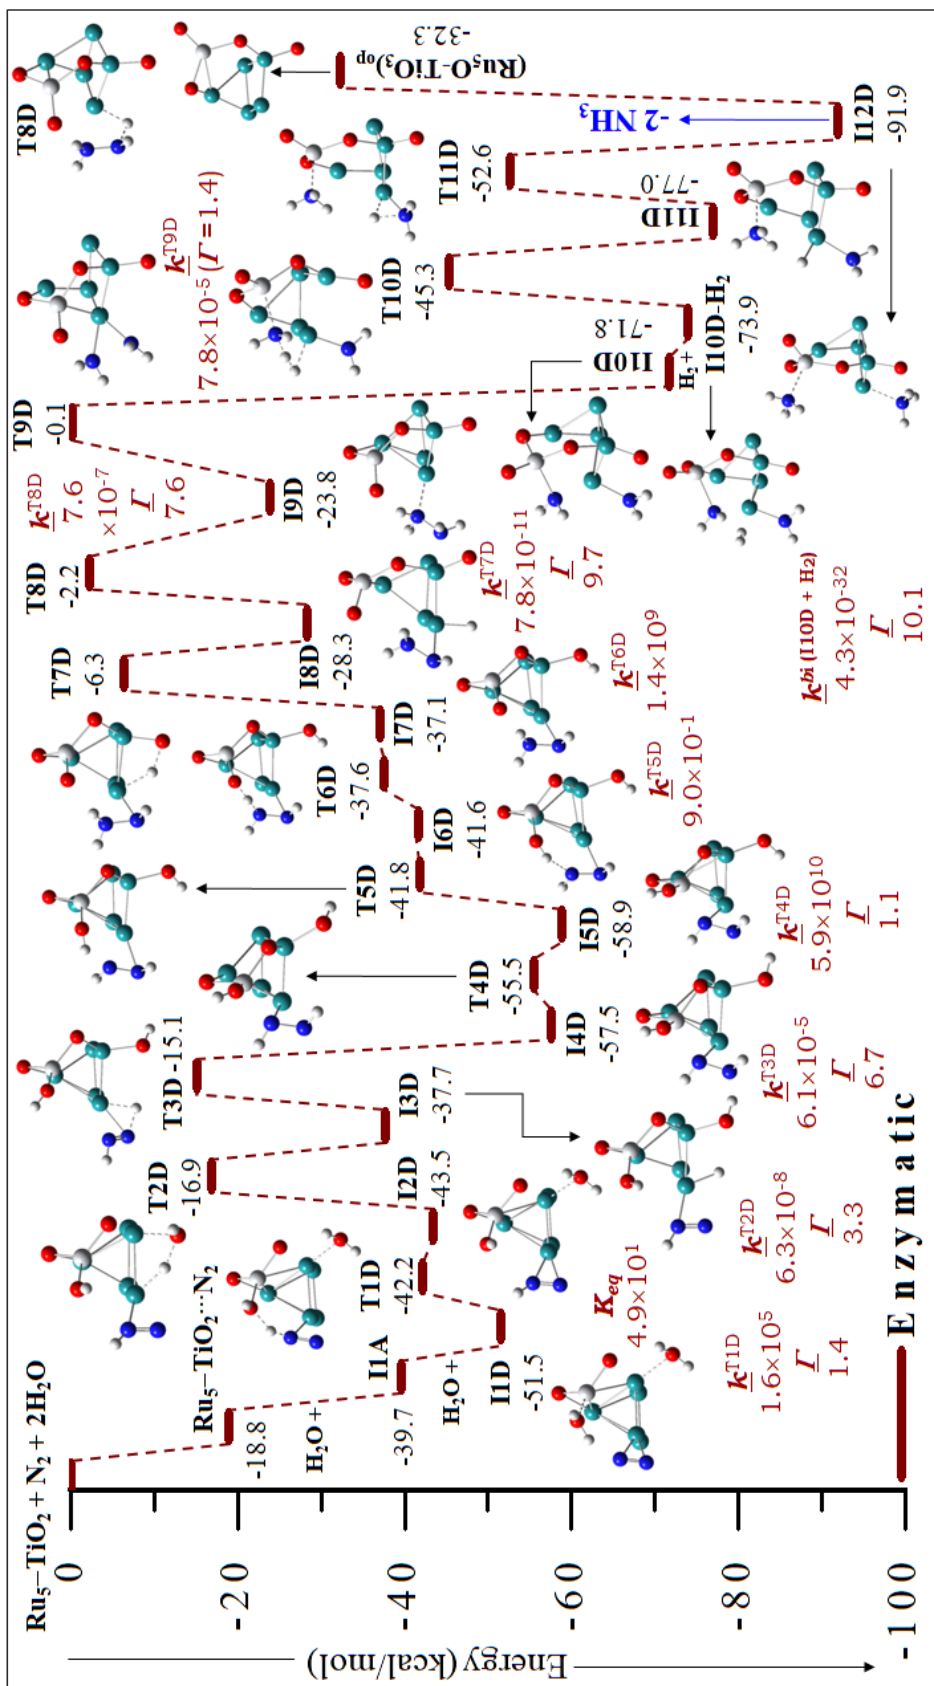

Figure S5: Relative electronic energies of various intermediates and transition states with respect to the isolated reactants ( $\text{Ru}_5\text{-TiO}_2$ ,  $\text{N}_2$ , two  $\text{H}_2\text{O}$  and  $\text{H}_2$ ) in associated with the  $\text{NH}_3$  formation via enzymatic mechanism over  $\text{TiO}_2$  doped  $\text{Ru}_5$  cluster based on zpe-corrected B3LYP/def2-TZVP level of calculation. 1st ( $k$ ,  $\text{sec}^{-1}$ ) and 2nd ( $k^{bi}$ ,  $\text{cm}^3/\text{molecule}/\text{sec}$ ) order rate coefficients of various elementary reactions along with tunneling correction ( $\Gamma$ ) have also been supplied in the figure.

atoms of side-on \*NH\*NH group. In I4D, N of \*NH\*NH and H of \*OH are far apart from each other and thus, rotation of Ti adsorbed \*OH group is essential to make a room for N...H interaction between hydroxyl and diazene groups of I6D intermediate. Thereafter, feasible H-migration from \*OH to N of \*NH\*NH results in \*NH\*NH<sub>2</sub> containing I7D intermediate, which eventually forms \*NH<sub>2</sub>\*NH<sub>2</sub> containing I9D intermediate with appreciable energy barrier. Like alternating, here also, N-N bond within \*NH<sub>2</sub>\*NH<sub>2</sub> needs to be ruptured to eliminate two \*NH<sub>2</sub> groups in terms of ammonia. To cleave N-N bond, side-on \*NH<sub>2</sub>\*NH<sub>2</sub> requires 12.7 kcal/mol less activation energy than that of end-on \*N<sub>2</sub>H<sub>4</sub>. Ultimately, sequential hydrogenation of two \*NH<sub>2</sub> within I10D liberates two molecules of NH<sub>3</sub>, leaving Ru<sub>5</sub>O-TiO<sub>3</sub> oxide cluster at an end. Notably, that Ru<sub>5</sub>O-TiO<sub>3</sub> oxide cluster generated from the enzymatic mechanism has a different geometrical configuration than those were generated via other two mechanisms which were closed in nature ((Ru<sub>5</sub>O-TiO<sub>3</sub>)<sub>cl</sub>) and the former is energetically ~ 30.1 kcal/mol less stable than the closed structure. Elimination of two NH<sub>3</sub> from I10D occurs through two elementary reaction steps, covering transition structures T10D and T11D with calculated hydrogenation barriers 28.6 and 24.4 kcal/mol, respectively. Summarizing, like alternating, the mechanism of enzymatic is also less effective to convert N<sub>2</sub> into NH<sub>3</sub>.

## References

- (1) Truhlar, D. G.; Garrett, B. C.; Klippenstein, S. J. Current status of transition-state theory. *The Journal of physical chemistry* **1996**, *100*, 12771–12800.
- (2) Canneaux, S.; Bohr, F.; Henon, E. KiSThElP: a program to predict thermodynamic properties and rate constants from quantum chemistry results. *Journal of computational chemistry* **2014**, *35*, 82–93.
- (3) Ling, C.; Niu, X.; Li, Q.; Du, A.; Wang, J. Metal-free single atom catalyst for N<sub>2</sub> fixation driven by visible light. *Journal of the American Chemical Society* **2018**, *140*, 14161–14168.



Table S1: Optimized geometries and zpe-corrected electronic energies from the B3LYP/def2-TZVP level of calculation.

| Species                                             | Cartesian coordinates                                                                                                                                                                                                                                                                                                                                                                                                                                                                    | (E) <sub>zpe</sub> |
|-----------------------------------------------------|------------------------------------------------------------------------------------------------------------------------------------------------------------------------------------------------------------------------------------------------------------------------------------------------------------------------------------------------------------------------------------------------------------------------------------------------------------------------------------------|--------------------|
| <b>Ru<sub>5</sub><br/>(sqp)</b>                     | Ru,0,0.,1.60662587,0.38048842<br>Ru,0,-1.60662587,0.,0.38048842<br>Ru,0,0.,-1.60662587,0.38048842<br>Ru,0,1.60662587,0.,0.38048842                                                                                                                                                                                                                                                                                                                                                       | -474.569151        |
| <b>Ru<sub>5</sub><br/>(tbp)</b>                     | Ru,0,-0.0196827706,0.0133092279,-0.0780779431<br>Ru,0,-0.0041653261,-0.0004178788,2.4583202988<br>Ru,0,2.1313710493,-0.0117753344,1.1773848163<br>Ru,0,0.8395672495,1.9066819984,1.1954883941<br>Ru,0,0.806883798,-1.9077980131,1.1749314338                                                                                                                                                                                                                                             | -474.518782        |
| <b>N<sub>2</sub></b>                                | N,0,0.,0.,0.5454531693<br>N,0,0.,0.,-0.5454531693                                                                                                                                                                                                                                                                                                                                                                                                                                        | -109.567674        |
| <b>Ru<sub>5</sub>···N<sub>2</sub><br/>(End-On)</b>  | Ru,0,1.4322594285,0.6786091587,0.4767393739<br>Ru,0,-0.7240364159,1.0294120151,1.0880689202<br>Ru,0,-1.4063399757,0.1647574302,-0.8952879487<br>Ru,0,0.7609327216,-0.1968310099,-1.5249390096<br>N,0,1.6430447381,-1.3701421596,-2.9001728666<br>N,0,2.1193468422,-2.067074461,-3.61904397<br>Ru,0,-0.0600849289,-1.3065452836,0.5893185609                                                                                                                                              | -584.163636        |
| <b>Ru<sub>5</sub>···N<sub>2</sub><br/>(Side-On)</b> | Ru,0,1.4267289406,0.6248285441,0.5133694063<br>Ru,0,-0.7089781648,1.2024477765,0.9906901307<br>Ru,0,-1.4148213101,0.1101388725,-0.861161222<br>Ru,0,0.7359838804,-0.4623220585,-1.3721204186<br>N,0,1.7070867355,-1.385139492,-3.0271005833<br>N,0,1.5062751664,-2.2409479337,-2.2924403163<br>Ru,0,-0.2057402481,-1.2201847088,0.8578600032                                                                                                                                             | -584.159520        |
| <b>H<sub>2</sub>O</b>                               | O,0,0.,0.,-0.1309831008<br>H,0,0.,-0.7649494602,0.4533331204<br>H,0,0.,0.7649494602,0.4533331204                                                                                                                                                                                                                                                                                                                                                                                         | -76.441815         |
| <b>I1</b>                                           | Ru,0,1.4397055276,0.6134999388,0.4937050021<br>Ru,0,-0.6972885711,1.2047657506,0.9888055393<br>Ru,0,-1.4333780955,0.1099584287,-0.8473983886<br>Ru,0,0.7116645942,-0.4795147987,-1.376874559<br>N,0,1.7341915427,-1.3709660865,-3.0186309777<br>N,0,1.5149357422,-2.2385797661,-2.3001288112<br>Ru,0,-0.2232971615,-1.2103415772,0.8696191432<br>O,0,3.6610337379,0.6508674105,1.0795762571<br>H,0,4.2757307737,0.8158817805,0.3536716605<br>H,0,3.8966809099,-0.2049870806,1.4568561344 | -660.621081        |
| <b>T1</b>                                           | Ru,0,1.093316634,0.1159966035,0.6666466558<br>Ru,0,-0.9754711955,0.9205703419,1.0281686449<br>Ru,0,-1.6694162661,0.2332237844,-1.0200653274<br>Ru,0,0.5154987835,-0.537728439,-1.4280698247<br>N,0,2.4486759339,-0.9769024516,-1.8705820248<br>N,0,1.9087559774,-2.0318679896,-1.6436844395<br>Ru,0,-0.8339958742,-1.4827319334,0.5438379023<br>O,0,3.1065524066,0.1638383793,0.2467417425<br>H,0,3.2027265858,-0.5465344215,-1.1645091872<br>H,0,3.7950290145,-0.025776874,0.8946088581 | -660.557535        |
| <b>I2</b>                                           | Ru,0,1.483112493,0.5703045554,0.7458701853<br>Ru,0,-0.6484388777,1.264511272,0.9761823563                                                                                                                                                                                                                                                                                                                                                                                                | -660.594824        |

|            |                                                                                                                                                                                                                                                                                                                                                                                                                                                                                          |             |
|------------|------------------------------------------------------------------------------------------------------------------------------------------------------------------------------------------------------------------------------------------------------------------------------------------------------------------------------------------------------------------------------------------------------------------------------------------------------------------------------------------|-------------|
|            | Ru,0,-1.219018882,0.2395198259,-0.9643905722<br>Ru,0,0.9844581066,-0.3893318689,-1.2820317138<br>N,0,2.2289888692,-1.2474994006,-2.6858338616<br>N,0,1.6884577712,-2.1084229098,-2.0084269848<br>Ru,0,-0.3078754614,-1.1674166952,0.8134472887<br>O,0,3.1207238115,1.2292008478,1.4736969755<br>H,0,2.9703529618,-1.5048291741,-3.3541845323<br>H,0,3.2676862078,1.2577545475,2.4253668588                                                                                               |             |
| <b>T2</b>  | Ru,0,1.4039502461,0.8996130076,0.4698593528<br>Ru,0,-0.7023745468,0.9664869981,1.2236919419<br>Ru,0,-1.4755920927,-0.2502122381,-0.518636395<br>Ru,0,0.6987267939,-0.3587265459,-1.3919157381<br>N,0,2.0175333338,-2.0754161318,-2.3340753035<br>N,0,1.4006223032,-2.1278625115,-1.2706514882<br>Ru,0,0.3008779158,-1.2980236145,0.846799205<br>O,0,2.9785136825,1.8474266611,0.9638497495<br>H,0,2.6549161082,-2.8704163585,-2.5023617829<br>H,0,3.4784952559,1.6712387336,1.7670684584 | -660.586270 |
| <b>I3</b>  | Ru,0,1.6095074678,0.7985290298,0.5553112149<br>Ru,0,-0.4306276579,0.6087102818,1.426146868<br>Ru,0,-1.2891611951,-0.1826170762,-0.5203662541<br>Ru,0,0.8042838495,0.0627514336,-1.5433081779<br>N,0,1.8838849081,-2.4222561205,-2.4617052302<br>N,0,1.3286656746,-1.8350710021,-1.5304583387<br>Ru,0,0.6495202809,-1.5176790007,0.2792060051<br>O,0,3.0073992461,1.9102271321,1.1846986563<br>H,0,2.1731742174,-3.3706821068,-2.1753107654<br>H,0,3.0190212087,2.3521924291,2.0394130221 | -660.598721 |
| <b>T3</b>  | Ru,0,1.2398386898,1.0867606128,0.5137094665<br>Ru,0,-0.808617596,0.896062019,1.3539824513<br>Ru,0,-1.6680999269,-0.0218766892,-0.6324229542<br>Ru,0,0.4610954542,0.2990023635,-1.6323026189<br>N,0,2.8533150874,-0.9135427827,-1.2483142077<br>N,0,1.5834666936,-1.2275434411,-1.1731582295<br>Ru,0,0.2674362508,-1.2007622942,0.281714489<br>O,0,3.0377858364,0.9440345777,0.4071329336<br>H,0,3.4508173898,-1.7412076775,-1.2597018632<br>H,0,3.151407121,0.0228633116,-0.4709444668   | -660.547714 |
| <b>I4</b>  | Ru,0,1.1761611859,1.0634696885,0.781905799<br>Ru,0,-0.8797034621,0.5851146677,1.5020864502<br>Ru,0,-1.5709470992,-0.1193045493,-0.646899307<br>Ru,0,0.589563271,0.3408364894,-1.388214677<br>N,0,2.6873704046,-1.7312255544,-1.5496781929<br>N,0,1.4040786882,-1.423399703,-1.2364717085<br>Ru,0,0.2585066193,-1.3985435125,0.2936486334<br>O,0,2.2371984828,2.2651302608,1.3303266856<br>H,0,2.9837258599,-2.6280842458,-1.184099875<br>H,0,3.3720280496,-0.9962535415,-1.3996378077    | -660.576411 |
| <b>T3'</b> | Ru,0,1.2722202101,1.3483761221,0.0768717573<br>Ru,0,-0.9516522959,1.5398410789,0.5718628643<br>Ru,0,-1.4954513159,0.0389755424,-1.0671937263<br>Ru,0,0.8132860405,-0.1184750286,-1.5921673117<br>N,0,2.6581141983,-0.6443515273,-2.3628101629<br>N,0,2.3685286011,-1.2411786962,-1.2211015475<br>Ru,0,-0.0017011079,-0.7139505494,0.7332450154<br>O,0,2.6785204337,0.3525638681,0.6697455008<br>H,0,3.3996922871,0.0626922437,-2.2793875674                                              | -660.521787 |

|                        |                                                                                                                                                                                                                                                                                                                                                                                                                                                                                                                                                                                                                                        |             |
|------------------------|----------------------------------------------------------------------------------------------------------------------------------------------------------------------------------------------------------------------------------------------------------------------------------------------------------------------------------------------------------------------------------------------------------------------------------------------------------------------------------------------------------------------------------------------------------------------------------------------------------------------------------------|-------------|
|                        | H,0,2.7658239489,-0.5979840537,-0.2025488218                                                                                                                                                                                                                                                                                                                                                                                                                                                                                                                                                                                           |             |
| <b>I4'</b>             | Ru,0,1.1083322415,0.7848400232,0.84104309<br>Ru,0,-1.0958624027,1.1299950784,0.9617358908<br>Ru,0,-1.4865746685,-0.233779275,-0.8523873973<br>Ru,0,0.8016154327,-0.5267452833,-1.0299164387<br>N,0,2.5235813258,-0.7853135162,-2.0896580922<br>N,0,2.1456086131,-1.9558538605,-1.554808758<br>Ru,0,-0.4483399683,-1.2979083576,1.05196436<br>O,0,2.483460055,1.6728108394,1.2814051895<br>H,0,3.3909511716,-0.4110664344,-1.6942605309<br>H,0,2.7753291996,-2.293669214,-0.8188463132                                                                                                                                                  | -660.567849 |
| <b>I4WT</b>            | O,0,2.0862473035,2.1829713,1.2647541784<br>Ru,0,1.0541482785,0.9331049515,0.7564817023<br>Ru,0,0.1847208913,-1.563332696,0.1608981618<br>N,0,1.2728170095,-1.411815908,-1.4098139598<br>N,0,2.6650855169,-1.4082230147,-1.6801107692<br>Ru,0,-0.9264042375,0.2914808789,1.5637902093<br>Ru,0,-1.7286694581,-0.2961037728,-0.5723151198<br>Ru,0,0.3740338524,0.3160068571,-1.3975506294<br>O,0,1.9731780005,1.0388167955,-2.8391287879<br>H,0,2.9325981038,-2.3175045947,-2.0472422394<br>H,0,3.2008010286,-1.2188549165,-0.8347559374<br>H,0,2.5561865898,0.2528556316,-2.7057618488<br>H,0,2.4558871207,1.806257488,-2.50783896       | -737.043947 |
| <b>T4</b>              | O,0,2.2327221959,1.8373752291,1.4046244729<br>Ru,0,0.8761754927,0.9603585274,0.8878172972<br>Ru,0,0.3620185693,-1.4115969469,0.2856503646<br>N,0,1.1232494205,-1.4721272362,-1.5074783314<br>N,0,2.8191614645,-1.3398616759,-1.7902349991<br>Ru,0,-1.255627873,0.5821565721,1.4926703255<br>Ru,0,-1.6846930461,-0.3191334752,-0.538262792<br>Ru,0,0.4623382251,0.3160603845,-1.4273496657<br>O,0,1.7123992769,0.9978960277,-2.8256192738<br>H,0,3.1150023805,-2.1865858074,-2.262591757<br>H,0,3.3502996974,-1.1746126737,-0.9405981209<br>H,0,2.8281519377,-0.5046235523,-2.4010227306<br>H,0,2.0696882588,1.8765756268,-2.6530677896 | -737.023751 |
| <b>I5</b>              | O,0,2.6570399547,2.1778438273,0.4483368039<br>Ru,0,1.4015789241,1.0652721455,0.3215868388<br>Ru,0,1.6016357216,-1.1896697292,-0.6332263086<br>N,0,1.1233627221,-0.2906484853,-2.0791299594<br>Ru,0,-0.2795576678,0.4050492999,1.6639839013<br>Ru,0,-0.7745954983,-0.8687967784,-0.1604973819<br>Ru,0,-0.0560124328,0.919074838,-1.6861242653<br>O,0,-0.9001305299,2.2454144543,-2.764214893<br>H,0,-0.6658961936,2.3958774277,-3.6860887358                                                                                                                                                                                            | -680.534232 |
| <b>H<sub>2</sub></b>   | H,0,-0.4462930319,0.50802138,0.<br>H,0,0.2976299119,0.50802138,0.                                                                                                                                                                                                                                                                                                                                                                                                                                                                                                                                                                      | -1.169574   |
| <b>I5H<sub>2</sub></b> | O,0,2.7631535461,1.8791862396,0.4529844034<br>Ru,0,1.3919328103,0.9151096985,0.3457919322<br>Ru,0,1.2760570001,-1.4093635164,-0.5171827562<br>N,0,0.9174534626,-0.5090183992,-2.0185992608<br>Ru,0,-0.395598826,0.5896199804,1.6673994258<br>Ru,0,-1.0896598727,-0.686014509,-0.0617809063<br>Ru,0,-0.0582364995,0.8680082373,-1.6711642967<br>O,0,-0.7399177919,2.2761242244,-2.7606764409<br>H,0,-0.5115819024,2.3713347112,-3.6912713762                                                                                                                                                                                            | -681.717046 |

|            |                                                                                                                                                                                                                                                                                                                                                                                                                                                                                                                                              |             |
|------------|----------------------------------------------------------------------------------------------------------------------------------------------------------------------------------------------------------------------------------------------------------------------------------------------------------------------------------------------------------------------------------------------------------------------------------------------------------------------------------------------------------------------------------------------|-------------|
|            | H,0,3.0785234152,-1.5723636253,-0.5130807215<br>H,0,2.8464346582,-2.3345510415,-0.7354740029                                                                                                                                                                                                                                                                                                                                                                                                                                                 |             |
| <b>T5</b>  | O,0,2.8326705291,1.8658953558,0.5411491101<br>Ru,0,1.4500359751,0.9286325246,0.3559938979<br>Ru,0,1.4057264694,-1.4289314593,-0.2740598671<br>N,0,1.1636359638,-0.7602547435,-2.0030642793<br>Ru,0,-0.5074292009,0.8506631719,1.4826646194<br>Ru,0,-1.0741654401,-0.6890972654,-0.0472566192<br>Ru,0,0.1665230225,0.6703024718,-1.7123451162<br>O,0,-0.4432339383,2.1468342057,-2.7225032115<br>H,0,-0.6644637442,2.0226353059,-3.6540160203<br>H,0,2.7706731179,-2.2118964386,0.126338608<br>H,0,2.3785872458,-1.0067121288,-1.5959551219   | -681.671889 |
| <b>I6</b>  | O,0,2.4788232234,1.8424516995,0.7847500843<br>Ru,0,1.2169788193,0.7740577877,0.4734803213<br>Ru,0,0.9492725145,-1.5127816328,-0.0630112923<br>N,0,0.8779869102,-1.1547049476,-1.8921079404<br>Ru,0,-0.6174656275,0.2478452364,1.7686649401<br>Ru,0,-1.7727645648,-0.3349507276,-0.008682512<br>Ru,0,-0.1009221661,0.3878129672,-1.5238539241<br>O,0,-0.7810020654,1.8353982283,-2.53289577<br>H,0,-1.5880462222,1.6955513145,-3.0452590225<br>H,0,2.4707755863,-1.8985869991,-0.298268705<br>H,0,1.5837755926,-1.2822559264,-2.6178101794    | -681.711101 |
| <b>T6</b>  | O,0,2.6663603222,2.4226539748,0.5415051047<br>Ru,0,1.5042140221,1.2367644321,0.2341630074<br>Ru,0,1.0700420668,-1.2467265974,-0.2890785319<br>N,0,1.3449266997,-0.7905075344,-2.2377473561<br>Ru,0,-0.0288742644,0.2874339092,1.5416373826<br>Ru,0,-1.2161039353,-0.4330896766,-0.3420271198<br>Ru,0,0.2814662286,0.7229438575,-1.7425652268<br>O,0,-0.3793251633,2.2357505948,-2.6865899321<br>H,0,-1.0675056483,2.0728430051,-3.3447814597<br>H,0,1.6970206725,-2.0169659115,-1.6450911737<br>H,0,2.2431479994,-0.6465150536,-2.6986766947 | -681.683453 |
| <b>I7</b>  | O,0,2.4993294195,1.8157890655,0.871377342<br>Ru,0,1.1061799336,0.8983851149,0.6125474185<br>Ru,0,0.7397925706,-1.4473024288,-0.0478414217<br>N,0,1.0810359064,-1.1775859749,-2.0582976738<br>Ru,0,-0.6265093972,0.1226995146,1.8280907904<br>Ru,0,-1.5613224498,-0.6413694046,-0.0825843712<br>Ru,0,0.029635512,0.4703064432,-1.5333679447<br>O,0,-0.5008257536,2.0402625251,-2.4661584584<br>H,0,-1.2854105541,1.9921864521,-3.0287043676<br>H,0,2.0357264752,-1.0024580336,-2.3635164562<br>H,0,0.6397493372,-1.7964022734,-2.7318958574   | -681.732099 |
| <b>I7'</b> | O,0,2.5452158826,1.8956287194,0.4029222807<br>Ru,0,1.1355515788,0.9732930334,0.2538798259<br>Ru,0,0.6868229982,-1.3748304369,-0.3754749399<br>N,0,1.0098152711,-1.0765214888,-2.3832284138<br>Ru,0,-0.5482589949,0.2483628882,1.5576300113<br>Ru,0,-1.594193997,-0.5068914797,-0.3032461652<br>Ru,0,-0.0539543162,0.5522951614,-1.8265778062<br>O,0,-0.6760922863,2.0450374941,-2.8348759537<br>H,0,-0.1833691628,2.8644075326,-2.6909964975<br>H,0,1.9648382669,-0.8974617502,-2.6839579416<br>H,0,0.5628217597,-1.6728496734,-3.0737344    | -681.734109 |

|                                                                    |                                                                                                                                                                                                                                                                                                                                                                                                                                                                                                                                          |              |
|--------------------------------------------------------------------|------------------------------------------------------------------------------------------------------------------------------------------------------------------------------------------------------------------------------------------------------------------------------------------------------------------------------------------------------------------------------------------------------------------------------------------------------------------------------------------------------------------------------------------|--------------|
| <b>T7</b>                                                          | O,0,2.4264628242,1.950602009,0.7793424496<br>Ru,0,1.222668115,0.7858749107,0.5997953954<br>Ru,0,0.5764826773,-1.3627400204,-0.2874372837<br>N,0,0.7818607331,-0.2886611606,-3.0908870162<br>Ru,0,-0.4977261054,-0.1011499799,1.7663448837<br>Ru,0,-1.6299835492,-0.4979058775,-0.1991185649<br>Ru,0,-0.1174614898,0.7634025579,-1.510756502<br>O,0,-0.2800587638,1.7716402972,-3.0009613161<br>H,0,0.3230983655,0.834595389,-3.5321277921<br>H,0,1.7861132237,-0.4055801151,-3.041500921<br>H,0,0.3281939696,-1.1359940103,-3.4061433327 | -681.657516  |
| <b>Ru<sub>5</sub>O<sub>2</sub></b>                                 | O,0,2.5750770366,1.8163036972,0.7058160611<br>Ru,0,1.2110525453,0.8578860498,0.5574104371<br>Ru,0,0.5114784491,-1.3029994285,-0.3968649405<br>Ru,0,-0.3461445734,-0.1749651597,1.7504241904<br>Ru,0,-1.8614141425,-0.3263132918,-0.1779745385<br>Ru,0,-0.4079591497,0.6905601259,-1.5088834999<br>O,0,-0.2937311653,1.5352720071,-2.9490007097                                                                                                                                                                                           | -625.121302  |
| <b>NH<sub>3</sub></b>                                              | N,0,0,0,-0.12910107<br>H,0,-0.0000000025,-0.9429656822,0.2429972659<br>H,0,-0.8166322344,0.4714828433,0.2429972659<br>H,0,0.8166322369,0.4714828389,0.2429972659                                                                                                                                                                                                                                                                                                                                                                         | -56.551514   |
| <b>Ru<sub>5</sub>-TiO<sub>2</sub></b>                              | O,0,2.1985184991,-0.2105892619,2.1282281337<br>Ru,0,0.9622254282,0.8031454627,0.8154847807<br>Ru,0,-1.2279721705,1.6132144357,0.5125190599<br>Ru,0,-1.3729658062,0.5694057479,-1.4388298124<br>Ru,0,0.7250236016,-0.2950813331,-1.2174577581<br>Ru,0,-0.8751092892,-0.8640867454,0.6520623297<br>O,0,-0.1491977822,-2.1696849362,1.9915791523<br>Ti,0,1.3921765191,-1.5656283697,1.3523061143                                                                                                                                            | -1474.737824 |
| <b>Ru<sub>5</sub>-TiO<sub>2</sub>••N<sub>2</sub><br/>(End-On)</b>  | O,0,2.225970656,-0.2306069872,1.9349763492<br>Ru,0,0.9468697088,0.8663488323,0.7673859093<br>Ru,0,-1.2530193848,1.6399087778,0.6019787213<br>Ru,0,-1.5150234336,0.6787694688,-1.3625740317<br>Ru,0,0.641843137,-0.2057219674,-1.320626189<br>N,0,2.1341561123,-1.1495734192,-2.2695796356<br>N,0,2.8951083517,-1.6326587264,-2.9190257388<br>Ru,0,-0.8587420504,-0.8429949637,0.6205297648<br>O,0,0.0008142325,-2.2645677935,1.7308243688<br>Ti,0,1.4725769805,-1.5464362315,1.0460941417                                                | -1584.333762 |
| <b>Ru<sub>5</sub>-TiO<sub>2</sub>••N<sub>2</sub><br/>(Side-On)</b> | O,0,2.300485444,-0.3554137185,1.7207738882<br>Ru,0,0.9263423306,0.8713037164,0.7411528565<br>Ru,0,-1.2561138618,1.6902800789,0.5848642579<br>Ru,0,-1.5939719308,0.6959855267,-1.3386138757<br>Ru,0,0.5685878092,-0.2126318203,-1.3102053484<br>N,0,2.250848136,-1.2351580947,-2.1812992625<br>N,0,2.008276053,-1.832529245,-1.2224364186<br>Ru,0,-0.8993962213,-0.8087833341,0.6623829053<br>O,0,-0.0369950767,-2.2823079896,1.6737882578<br>Ti,0,1.4407803178,-1.6350001198,0.8982457395                                                | -1584.335532 |
| <b>IIA</b>                                                         | O,0,2.1993314781,-0.2284707496,2.1208747965<br>Ru,0,0.950940649,0.814051939,0.8057259068<br>Ru,0,-1.2403457836,1.5973217333,0.5069174479<br>Ru,0,-1.3829754103,0.5759908794,-1.4360445287<br>Ru,0,0.7500966023,-0.265447973,-1.2536676979<br>N,0,2.1393556622,-1.0394675396,-2.6235114904<br>N,0,1.9167884365,-1.9454816657,-1.9437282022                                                                                                                                                                                                | -1660.810540 |

|            |                                                                                                                                                                                                                                                                                                                                                                                                                                                                                                                                                                                                                                         |              |
|------------|-----------------------------------------------------------------------------------------------------------------------------------------------------------------------------------------------------------------------------------------------------------------------------------------------------------------------------------------------------------------------------------------------------------------------------------------------------------------------------------------------------------------------------------------------------------------------------------------------------------------------------------------|--------------|
|            | Ru,0,-0.8726366004,-0.8672924521,0.6716085916<br>O,0,-0.1679625718,-2.1482464136,2.0037252526<br>O,0,2.6868551693,-3.0463007519,0.4254463509<br>H,0,3.6139575814,-3.2101964786,0.6321152456<br>H,0,2.5834363467,-3.0052205882,-0.5522252504<br>Ti,0,1.4162514407,-1.5972129393,1.3767525779                                                                                                                                                                                                                                                                                                                                             |              |
| <b>T1A</b> | O,0,2.0998751988,-0.2687408999,2.0796968131<br>Ru,0,0.875217668,0.6923692106,0.7472464548<br>Ru,0,-1.3166419285,1.4796922845,0.5157524776<br>Ru,0,-1.5398732742,0.5042628074,-1.4361795912<br>Ru,0,0.6188364901,-0.336243053,-1.3336950178<br>N,0,2.1663304873,-1.1556864142,-2.4581571576<br>N,0,1.7437777557,-1.9554269385,-1.6832205565<br>Ru,0,-0.9416195676,-0.9823111017,0.6336070952<br>O,0,-0.2651164321,-2.2347256773,1.9709300142<br>O,0,2.4769844074,-3.0193984031,0.4131768159<br>H,0,3.4015902413,-3.2386547731,0.5625031552<br>H,0,2.1983618644,-2.7154551397,-0.9824663279<br>Ti,0,1.3774980895,-1.733798902,1.426800825 | -1660.793747 |
| <b>I2A</b> | O,0,2.1706341979,-0.0497302244,2.1614596369<br>Ru,0,1.034335657,0.70845535,0.6907784478<br>Ru,0,-1.1322102241,1.5290916522,0.5660301248<br>Ru,0,-1.4206151699,0.5498160391,-1.3834144116<br>Ru,0,0.7031483482,-0.3046134339,-1.3521997099<br>N,0,1.9593260966,-0.7387548981,-2.8537176128<br>N,0,1.7627001744,-1.7987572747,-2.2907029417<br>Ru,0,-0.829816423,-0.9200632488,0.7172186844<br>O,0,-0.2622053936,-2.0254698991,2.2000516277<br>O,0,2.5739166217,-3.0294354091,1.3246847926<br>H,0,3.5302056236,-3.0629113532,1.2379279326<br>H,0,2.2879458108,-2.65167601,-2.5282339446<br>Ti,0,1.4659236804,-1.6448042903,1.827294374    | -1660.796204 |
| <b>T2A</b> | O,0,1.9400095363,0.0530379772,2.4009409146<br>Ru,0,1.1034787738,0.7003851154,0.7581121578<br>Ru,0,-1.0004097189,1.5609522278,0.3749239568<br>Ru,0,-1.2056080079,0.3992760574,-1.4940727744<br>Ru,0,0.8842248962,-0.537897442,-1.1865527128<br>N,0,1.9300962704,-0.7750129283,-2.7740391245<br>N,0,1.9150339668,-1.968392643,-3.0291651685<br>Ru,0,-0.8301622952,-0.8996367297,0.7238181701<br>O,0,-0.4807388571,-1.9090049026,2.3574870206<br>O,0,2.3724313642,-3.039062185,1.9227260421<br>H,0,3.3181769509,-3.1858878771,1.8503611196<br>H,0,2.6298557277,-2.2408446351,-3.7312861159<br>Ti,0,1.2668983927,-1.596767035,2.1439245146  | -1660.791011 |
| <b>I3A</b> | O,0,1.7116661873,-0.3433262966,2.3061475528<br>Ru,0,1.0756172067,0.6827551501,0.7927754644<br>Ru,0,-0.8303884286,1.9479450649,0.610241675<br>Ru,0,-1.2043702318,1.1770835649,-1.4560733524<br>Ru,0,0.6534937667,-0.1322362945,-1.3603347797<br>N,0,1.914036174,-0.9282712407,-2.4182846879<br>N,0,2.6484898018,-1.2890356092,-3.3016193762<br>Ru,0,-1.1217257037,-0.4937835909,0.5416917784<br>O,0,-0.979316186,-1.8425403907,1.9443278767<br>O,0,1.6479280244,-3.3809042996,1.4074671323<br>H,0,2.5463117523,-3.6894334064,1.2702084025<br>H,0,2.6178980365,-0.6898856085,-4.1489739612                                                | -1660.797888 |

|               |                                                                                                                                                                                                                                                                                                                                                                                                                                                                                                                                                                                                                                             |              |
|---------------|---------------------------------------------------------------------------------------------------------------------------------------------------------------------------------------------------------------------------------------------------------------------------------------------------------------------------------------------------------------------------------------------------------------------------------------------------------------------------------------------------------------------------------------------------------------------------------------------------------------------------------------------|--------------|
|               | Ti,0,0.7982176004,-1.8045220428,1.7580662754                                                                                                                                                                                                                                                                                                                                                                                                                                                                                                                                                                                                |              |
| <b>T3A</b>    | O,0,2.0337072186,-0.193906947,2.0767817729<br>Ru,0,1.1331610404,0.8474484019,0.68805585<br>Ru,0,-0.7072114198,1.9768103356,0.1611184022<br>Ru,0,-1.3968837947,0.3371320303,-1.3176993531<br>Ru,0,0.4702645674,-0.8968762484,-0.9392836284<br>N,0,1.9214579194,-1.227398886,-2.0610996918<br>N,0,2.8330392387,-2.0160564863,-1.7182063904<br>Ru,0,-0.9887767068,-0.4095543222,1.1199906546<br>O,0,-0.5716002157,-1.7953828393,2.4507431812<br>O,0,1.393681368,-2.5752108468,0.0981151868<br>H,0,2.4096827053,-2.5357126191,-0.6860124056<br>H,0,3.516566503,-2.2730365467,-2.4314912605<br>Ti,0,1.0577015764,-1.6851710259,1.696491682       | -1660.772024 |
| <b>I4A</b>    | O,0,1.9894148916,-0.2099732022,1.9636543237<br>Ru,0,1.1608758228,0.8148398674,0.5627491284<br>Ru,0,-0.6467823376,1.9902368416,0.0184973439<br>Ru,0,-1.3757972201,0.2843400391,-1.4001073965<br>Ru,0,0.4712293776,-0.9541273038,-1.0024679677<br>N,0,1.818626847,-1.2304463258,-2.2087606329<br>N,0,2.9180833672,-1.8506703486,-2.0251540428<br>Ru,0,-1.0209917051,-0.3454781604,1.0465350007<br>O,0,-0.7082825567,-1.7362546544,2.3817947338<br>O,0,1.1673972316,-2.5780248307,0.0944865608<br>H,0,3.0654004211,-2.3447942675,-1.1417766148<br>H,0,3.5232326947,-2.0350823325,-2.8163653113<br>Ti,0,0.9488791658,-1.7275203222,1.6611078749 | -1660.779252 |
| <b>T3B</b>    | O,0,1.9405726328,-0.2326060593,2.0840856065<br>Ru,0,1.1515346557,0.7899999133,0.6292485352<br>Ru,0,-0.5899117704,1.9946983589,-0.007067843<br>Ru,0,-1.2554787044,0.313608383,-1.5051500877<br>Ru,0,0.4912309289,-0.9613011914,-0.9830521971<br>N,0,2.2398335705,-1.6023488887,-1.6762188923<br>N,0,2.9939080284,-1.490351614,-2.6392222598<br>Ru,0,-1.044927794,-0.3650952206,0.9760820398<br>O,0,-0.7372113635,-1.7228231366,2.3446708629<br>O,0,1.3637535042,-2.7008600768,0.2228295577<br>H,0,2.1725457169,-2.4201587527,-0.67060443<br>H,0,2.6640104472,-0.7415324499,-3.2805926334<br>Ti,0,0.9560751477,-1.7227352654,1.7182587412     | -1660.746672 |
| <b>I4B</b>    | O,0,1.7513388341,-0.202634223,2.3088234623<br>Ru,0,1.1762458267,0.7938237534,0.7556169491<br>Ru,0,-0.4810763316,1.984456928,-0.1149508936<br>Ru,0,-1.0106245446,0.1892979139,-1.559853196<br>Ru,0,0.6960655387,-1.0338336469,-0.7973726806<br>N,0,2.3068230418,-1.5387993356,-1.8630213956<br>N,0,2.7653496803,-1.2566575949,-2.994252591<br>Ru,0,-1.0949543325,-0.2804656556,0.9360281138<br>O,0,-0.9959199213,-1.6092655476,2.3634769106<br>O,0,1.1161353644,-2.6148996329,0.3968652121<br>H,0,2.8681513026,-2.2686905739,-1.4075294778<br>H,0,2.1737166546,-0.5168941713,-3.3958115861<br>Ti,0,0.7460728868,-1.7063162137,1.9080211727   | -1660.773231 |
| <b>I4A-WT</b> | O,0,0.2532003602,0.0866915139,0.05525586<br>O,0,1.7596547199,-0.057943435,2.7521842195<br>Ru,0,2.4823688207,-1.7933255918,1.8729734161<br>Ru,0,0.0087794399,-2.63803817,1.7689032636                                                                                                                                                                                                                                                                                                                                                                                                                                                        | -1737.241943 |

|            |                                                                                                                                                                                                                                                                                                                                                                                                                                                                                                                                                                                                                                                                                                                                                                                  |              |
|------------|----------------------------------------------------------------------------------------------------------------------------------------------------------------------------------------------------------------------------------------------------------------------------------------------------------------------------------------------------------------------------------------------------------------------------------------------------------------------------------------------------------------------------------------------------------------------------------------------------------------------------------------------------------------------------------------------------------------------------------------------------------------------------------|--------------|
|            | O,0,-1.1041225024,-1.2628603041,2.5599293632<br>Ru,0,1.2441993664,-1.64539556,-0.2434817755<br>Ru,0,1.0325597164,-3.8486118705,-0.2580197265<br>Ru,0,2.1555659935,-4.0270400109,1.7795220088<br>N,0,4.1008635929,-0.9616824492,1.6934116804<br>N,0,4.3125099383,0.3091261805,1.7032171485<br>H,0,3.5369133839,0.9079057848,2.0071032424<br>H,0,5.2657217891,0.6346752481,1.8154478576<br>O,0,2.2698747452,-0.1761878408,-1.6146772122<br>H,0,3.1600243876,0.0382506225,-1.3104289201<br>H,0,1.669217659,0.5225412746,-1.2808450329<br>Ti,0,0.1863715896,-0.1798833921,1.8729796071                                                                                                                                                                                               |              |
| <b>T4A</b> | O,0,-0.0042177115,0.0503717012,0.2657675279<br>O,0,1.2241666722,-0.244280138,3.1308727927<br>Ru,0,2.3762078348,-1.4372708809,2.0999067618<br>Ru,0,-0.1065271558,-2.8468910342,1.6538818541<br>O,0,-1.4407775506,-1.6911369131,2.4140342351<br>Ru,0,1.2849762758,-1.4610681317,-0.072004597<br>Ru,0,1.4840966318,-3.6450136267,-0.2539513664<br>Ru,0,2.089904069,-3.7786927642,2.002933785<br>N,0,4.0191997239,-0.8703514283,1.8196886221<br>N,0,4.3885485325,0.1270378542,0.8761793564<br>H,0,4.3555291678,1.0362486795,1.3373265882<br>H,0,5.3566717825,-0.0394341823,0.6065397855<br>O,0,2.4403720089,0.0644103512,-1.1331358036<br>H,0,3.2115493582,0.1993801301,-0.51267953<br>H,0,1.8683143701,0.8443661051,-1.0712281345<br>Ti,0,-0.2143150096,-0.399450722,2.0093411226   | -1737.237004 |
| <b>I5A</b> | O,0,-1.3273557945,2.2922422978,-0.8181944323<br>O,0,-0.0126702832,1.8772457834,1.9980673528<br>Ru,0,1.1002552867,0.7053426318,0.8903296975<br>Ru,0,-1.5288122808,-0.7385559406,0.4873437371<br>O,0,-2.7254640799,0.5029151809,1.3023401762<br>Ru,0,-0.1433475943,0.726104863,-1.2410382417<br>Ru,0,0.0051308321,-1.437971558,-1.4761596008<br>Ru,0,0.6116217948,-1.6412840849,0.8122422196<br>N,0,2.7724943936,1.1452295595,0.5879753814<br>N,0,3.1927142038,1.9789865557,-0.5083106608<br>H,0,3.6009765388,2.8247401443,-0.111699537<br>H,0,3.9473296852,1.488530826,-0.9881364062<br>O,0,1.1141003395,2.1661610837,-2.2506291583<br>H,0,1.9261535462,2.2346704584,-1.6491608918<br>H,0,0.6224246943,2.9988311624,-2.1936552768<br>Ti,0,-1.4584042823,1.7738240365,0.9065436412 | -1737.237507 |
| <b>T5A</b> | O,0,-1.4498052644,2.3312023154,-0.6575017125<br>O,0,-0.0548048691,1.7726385934,2.0818471308<br>Ru,0,1.0921715343,0.7003963512,0.9448359562<br>Ru,0,-1.569206899,-0.7479503806,0.4965445236<br>O,0,-2.7973440337,0.4378271552,1.3523284884<br>Ru,0,-0.1294606641,0.9179342851,-1.1752636968<br>Ru,0,-0.0835721916,-1.2317123963,-1.5442657451<br>Ru,0,0.6039080748,-1.6227872608,0.701058871<br>N,0,2.7618569325,1.0864996975,0.6797057015<br>N,0,3.2049178037,2.039608007,-0.6120088918<br>H,0,3.5445297011,2.9078084844,-0.2102495985<br>H,0,3.974159956,1.5487840369,-1.0573377565<br>O,0,1.0994483161,2.0880317956,-2.2123471148                                                                                                                                              | -1737.234416 |



|            |                                                                                                                                                                                                                                                                                                                                                                                                                                                                                                                                                                                         |              |
|------------|-----------------------------------------------------------------------------------------------------------------------------------------------------------------------------------------------------------------------------------------------------------------------------------------------------------------------------------------------------------------------------------------------------------------------------------------------------------------------------------------------------------------------------------------------------------------------------------------|--------------|
|            | H,0,2.4123507068,2.2013818143,-1.3001605644<br>H,0,0.6422737431,2.7290807973,-2.769044444<br>Ti,0,-1.5542748465,1.7382707044,1.0297178529                                                                                                                                                                                                                                                                                                                                                                                                                                               |              |
| <b>I6A</b> | O,0,-1.6161473257,2.082640532,-0.6086096402<br>O,0,-0.147920409,1.5764828624,2.0657436758<br>Ru,0,1.1594646882,0.8271538468,0.8564292229<br>Ru,0,-1.7007622219,-1.0129476718,0.6780571069<br>O,0,-2.9066592457,0.1075384211,1.6157822378<br>Ru,0,-0.0318940683,1.2414937892,-1.2329104383<br>Ru,0,-0.4207894511,-0.9096336488,-1.4627078771<br>Ru,0,0.6460538146,-1.4829946261,0.556543512<br>N,0,2.7389750017,1.063623935,0.6654566639<br>O,0,1.5226981422,1.8834935808,-2.1168530918<br>H,0,1.372274256,1.9724332722,-3.0701508115<br>Ti,0,-1.686565181,1.3681387073,1.0898984397     | -1680.721100 |
| <b>T6A</b> | O,0,-1.6791636861,2.1518570313,-0.5176511719<br>O,0,-0.089687137,1.5248219697,2.1054717864<br>Ru,0,1.1491094567,0.805316929,0.823782509<br>Ru,0,-1.7271181664,-1.0101242245,0.6584138614<br>O,0,-2.8768627033,0.0992170497,1.6571454936<br>Ru,0,-0.0939723025,1.3244619413,-1.2013181143<br>Ru,0,-0.506726023,-0.7943653973,-1.515164187<br>Ru,0,0.6067922018,-1.4970672535,0.4205731926<br>N,0,2.7166081711,1.038422841,0.5293421832<br>O,0,1.3937346366,2.0566675179,-2.1543525164<br>H,0,1.9090352205,1.4986402104,-2.7469156217<br>Ti,0,-1.6521966684,1.3704253851,1.140688585      | -1680.715842 |
| <b>I7A</b> | O,0,-1.4091897376,2.0865279377,-0.5268333221<br>O,0,0.2721772506,1.5303538426,2.0361498705<br>Ru,0,1.4354683784,0.7481491415,0.7228525811<br>Ru,0,-1.4800770303,-1.0113304322,0.7926731054<br>O,0,-2.5753582935,0.1630100237,1.7969387715<br>Ru,0,0.1006727355,1.1819694149,-1.2580768976<br>Ru,0,-0.3734319893,-0.9557078081,-1.4390373363<br>Ru,0,0.8459511825,-1.5434784366,0.4907791508<br>N,0,2.9799765995,0.9996716632,0.3099820719<br>O,0,1.5504594914,1.6929294692,-2.3340407052<br>H,0,2.4131701474,1.7120523604,-1.8832479837<br>Ti,0,-1.3463147346,1.3659778237,1.1665256937 | -1680.730687 |
| <b>T7A</b> | O,0,-1.6461624789,2.0776608579,-0.6427113459<br>O,0,0.0308459129,1.5439792935,1.9947046449<br>Ru,0,1.1195384272,0.7205316534,0.6303794695<br>Ru,0,-1.7370346629,-0.9936986548,0.7098993492<br>O,0,-2.8076510523,0.1997794825,1.7124858585<br>Ru,0,-0.1309180163,1.1750223145,-1.3111971811<br>Ru,0,-0.6316237052,-0.994608084,-1.5282798681<br>Ru,0,0.6206973504,-1.5495291825,0.3831773127<br>N,0,2.5681626724,1.1536183334,-0.1307704664<br>O,0,1.3342572843,1.6430826117,-2.1706753792<br>H,0,2.3438193197,1.4945959012,-1.2457388291<br>Ti,0,-1.5584260513,1.3795624733,1.089134435 | -1680.707277 |
| <b>I8A</b> | O,0,-1.3880999632,2.0322634755,-0.5536090043<br>O,0,0.2917535676,1.5134400285,2.0827639339<br>Ru,0,1.3689233638,0.7227991085,0.6766473582<br>Ru,0,-1.4934664709,-0.9975781675,0.7737786871<br>O,0,-2.5483074016,0.1830164635,1.8070635065<br>Ru,0,0.1321403041,1.185344427,-1.2557546478                                                                                                                                                                                                                                                                                                | -1680.711840 |

|             |                                                                                                                                                                                                                                                                                                                                                                                                                                                                                                                                                                                                                                                                                  |              |
|-------------|----------------------------------------------------------------------------------------------------------------------------------------------------------------------------------------------------------------------------------------------------------------------------------------------------------------------------------------------------------------------------------------------------------------------------------------------------------------------------------------------------------------------------------------------------------------------------------------------------------------------------------------------------------------------------------|--------------|
|             | Ru,0,-0.4393237924,-0.9982498831,-1.4334833957<br>Ru,0,0.8655956744,-1.5047355148,0.4857309952<br>N,0,2.9759017478,1.1095477047,0.1362549556<br>O,0,1.2769422638,1.6867720799,-2.4014394156<br>H,0,3.1991967247,1.5454990477,-0.7739103906<br>Ti,0,-1.2946470182,1.3754472301,1.1985734175                                                                                                                                                                                                                                                                                                                                                                                       |              |
| <b>T8A</b>  | O,0,-1.3623395773,2.0598215368,-0.5405181803<br>O,0,0.2747409248,1.5731265073,2.0327816209<br>Ru,0,1.455570599,0.7337542567,0.6625348137<br>Ru,0,-1.4768992875,-1.0022506018,0.7799135263<br>O,0,-2.524480986,0.1474173797,1.8394242847<br>Ru,0,0.098836806,1.2310587139,-1.320395754<br>Ru,0,-0.4312933186,-0.9787950222,-1.4343507405<br>Ru,0,0.9065926086,-1.4545393515,0.4527077424<br>N,0,3.0905806316,1.0618763819,-0.0933901887<br>O,0,1.2249260553,1.6963452858,-2.4835131419<br>H,0,3.1284653477,1.5442714526,-0.9957198028<br>Ti,0,-1.2864267836,1.36258657,1.2092649873<br>H,0,3.2082306863,0.9332269372,1.2496598515<br>H,0,2.6908592936,0.5992159537,2.0359889813   | -1681.832891 |
| <b>I9A</b>  | O,0,-1.3532863985,2.0483880472,-0.5056416676<br>O,0,0.1972925082,1.4936103212,2.1074398981<br>Ru,0,1.4738516769,0.7011196037,0.7827447821<br>Ru,0,-1.5037346434,-1.0544413328,0.7857690888<br>O,0,-2.5716679833,0.0846000807,1.841533314<br>Ru,0,0.0691516228,1.262253796,-1.3558657415<br>Ru,0,-0.4617693499,-0.9799413497,-1.3775536924<br>Ru,0,0.9232065201,-1.4022025901,0.5282330073<br>N,0,3.0851714542,1.0672486502,-0.1238705077<br>O,0,1.25065332,1.6701429463,-2.4738936288<br>H,0,3.1024598831,1.3925244663,-1.0850484163<br>Ti,0,-1.3254745092,1.3087050314,1.2394534329<br>H,0,3.9941903745,1.0658970547,0.3153010508<br>H,0,2.3866695245,0.4821112751,2.0930330804 | -1681.910339 |
| <b>T9A</b>  | O,0,-1.2681860358,2.0252792391,-0.3963952338<br>O,0,0.1948235772,1.2577356999,2.1796541216<br>Ru,0,1.3698645599,0.5699125049,0.7133655902<br>Ru,0,-1.6886477848,-1.1025406878,0.698337146<br>O,0,-2.6862748712,0.0802295407,1.7835061278<br>Ru,0,0.1486608209,1.1595433094,-1.3058743311<br>Ru,0,-0.6766950504,-0.9862072334,-1.4087790557<br>Ru,0,0.6406515342,-1.5300865869,0.6405242275<br>N,0,3.223944161,0.9392916738,0.0194943478<br>O,0,1.2220930722,1.6557670632,-2.5038936139<br>H,0,3.283206289,1.6722123403,-0.6810042984<br>Ti,0,-1.3315843758,1.2532691495,1.2809937916<br>H,0,4.1323695984,0.7624917644,0.4263419005<br>H,0,2.7024865052,1.3831162228,1.3253642798 | -1681.869520 |
| <b>I10A</b> | O,0,-1.0356593612,2.0068428819,-0.4281391662<br>O,0,0.7695755532,1.1950447354,1.9396094948<br>Ru,0,1.2554149348,0.1685102069,0.3266344371<br>Ru,0,-1.8826813139,-1.0048802434,0.7338310144<br>O,0,-2.396922333,0.3314797518,1.9552360865<br>Ru,0,0.0542970757,0.8921480525,-1.5394110622<br>Ru,0,-1.1150759507,-1.0818961059,-1.5055762838<br>Ru,0,0.3069075321,-1.8362359429,0.3368827006<br>N,0,3.1751922119,1.2876056006,0.5059674623                                                                                                                                                                                                                                         | -1681.940722 |

|                                                       |                                                                                                                                                                                                                                                                                                                                                                                                                                                                                                                                                                                                                                                                                                                                                                                      |              |
|-------------------------------------------------------|--------------------------------------------------------------------------------------------------------------------------------------------------------------------------------------------------------------------------------------------------------------------------------------------------------------------------------------------------------------------------------------------------------------------------------------------------------------------------------------------------------------------------------------------------------------------------------------------------------------------------------------------------------------------------------------------------------------------------------------------------------------------------------------|--------------|
|                                                       | O,0,0.8658334492,1.312810973,-2.9614490127<br>H,0,3.3758672292,1.8431814773,-0.319086644<br>Ti,0,-0.9190879017,1.2105043204,1.2277126344<br>H,0,3.9864391404,0.7107169451,0.7027816526<br>H,0,3.012651124,1.9073252971,1.2969481063                                                                                                                                                                                                                                                                                                                                                                                                                                                                                                                                                  |              |
| <b>(Ru<sub>5</sub>O-TiO<sub>3</sub>)<sub>cl</sub></b> | O,0,0.0243669428,1.702862258,-1.5750425196<br>Ru,0,-0.827306925,1.8131937254,0.1347347357<br>Ru,0,0.9370434462,1.5320684019,1.5667783102<br>Ru,0,0.4058207462,-0.8319261459,1.7052547778<br>Ru,0,-1.1566908123,-0.4971817017,0.1716682362<br>Ru,0,2.1466034555,-0.0659468745,0.261100364<br>O,0,2.4141109114,-0.4380034663,-1.5636722418<br>O,0,-0.786408934,-1.2686120974,-1.5242557044<br>O,0,-2.0511417511,2.8689761198,0.6042940079<br>Ti,0,0.6028059203,-0.0342412193,-1.6448789659                                                                                                                                                                                                                                                                                             | -1625.355137 |
| <b>I4B-WT</b>                                         | O,0,1.9717874548,0.1506554318,2.1163655489<br>Ru,0,1.097124475,1.016853475,0.5012515914<br>Ru,0,-0.7485644223,1.9898737966,-0.230381472<br>Ru,0,-1.3225922164,0.0374379801,-1.4285137133<br>Ru,0,0.5500473107,-0.9943249912,-0.7671029938<br>N,0,2.0407864665,-1.5494199138,-1.9653683334<br>N,0,2.3569980256,-1.3452052915,-3.1648074573<br>Ru,0,-1.0948225742,-0.1757421159,1.0946177524<br>O,0,-0.7479986581,-1.2895168972,2.6359691064<br>O,0,1.2353769118,-2.3990316408,0.5232589169<br>H,0,2.6659838015,-2.2370603613,-1.527765099<br>H,0,1.7000763658,-0.6488459364,-3.541537081<br>Ti,0,0.9410832535,-1.3527439101,1.9677583499<br>O,0,3.2903082435,1.4654880995,0.2722530585<br>H,0,3.4624429427,0.9521437657,1.0899563465<br>H,0,3.7103986194,0.9973975094,-0.4592315211   | -1737.236607 |
| <b>T4B</b>                                            | O,0,2.0320936689,-0.2306681669,1.8480958073<br>Ru,0,1.1888418049,0.6161848887,0.226081965<br>Ru,0,-0.541394529,1.7503392123,-0.5240242173<br>Ru,0,-1.4821611387,-0.172543705,-1.5381553797<br>Ru,0,0.3906133182,-1.4283287275,-0.8025406761<br>N,0,2.061928304,-1.5388106121,-1.6973460592<br>N,0,2.6959987664,-0.5904448281,-2.364044369<br>Ru,0,-1.3066516311,-0.2170279494,0.8251353937<br>O,0,-0.8096803113,-1.3206557069,2.2742976823<br>O,0,1.2597421499,-2.7958072572,0.5927318687<br>H,0,2.7311599361,-2.1207816098,-1.1842629905<br>H,0,2.0059510743,-0.0789949312,-2.9132893008<br>Ti,0,0.9605041981,-1.6636717692,1.8853163216<br>O,0,3.0764567973,1.0330516664,-0.5600417037<br>H,0,3.752136674,0.9271436118,0.1225529722<br>H,0,3.1465509182,0.2078658842,-1.5192923143 | -1737.215588 |
| <b>I5B</b>                                            | O,0,1.4053138776,0.3199518438,2.4899054409<br>Ru,0,1.434299799,0.8510197454,0.6619350718<br>Ru,0,-0.6092989775,1.5025694581,0.143040085<br>Ru,0,-1.1178248676,-0.5347087975,-0.9785078097<br>Ru,0,0.9933463586,-1.3189158752,-0.5536912505<br>N,0,1.9984661125,-1.2465806778,-2.1285463981<br>N,0,3.0511048521,-0.4801617261,-2.6006370588<br>Ru,0,-1.7334701683,-0.3469473868,1.3398414371<br>O,0,-1.3661982884,-1.2522219901,2.9534323261<br>O,0,0.9519153872,-2.37971802,1.0547761417                                                                                                                                                                                                                                                                                             | -1737.259754 |

|            |                                                                                                                                                                                                                                                                                                                                                                                                                                                                                                                                                                                                                                                                                                                                                                                        |              |
|------------|----------------------------------------------------------------------------------------------------------------------------------------------------------------------------------------------------------------------------------------------------------------------------------------------------------------------------------------------------------------------------------------------------------------------------------------------------------------------------------------------------------------------------------------------------------------------------------------------------------------------------------------------------------------------------------------------------------------------------------------------------------------------------------------|--------------|
|            | H,0,1.8575648301,-2.0292404593,-2.7675175017<br>H,0,3.1798025273,0.3197545723,-1.9732686619<br>Ti,0,0.3496035761,-1.1614163578,2.2642044899<br>O,0,2.8808482635,1.3371140051,-0.529258589<br>H,0,3.1012602604,2.274337262,-0.4422077246<br>H,0,3.9056504576,-1.0264695961,-2.6763959984                                                                                                                                                                                                                                                                                                                                                                                                                                                                                                |              |
| <b>T5B</b> | O,0,1.2706650241,0.5584158862,2.42779949<br>Ru,0,1.316787674,0.9105031055,0.5655503266<br>Ru,0,-0.7592223124,1.3661457086,-0.0240695752<br>Ru,0,-1.0900997694,-0.7977244734,-0.9814740061<br>Ru,0,1.071131928,-1.364336457,-0.4911992047<br>N,0,2.0437636058,-1.2507835996,-2.0916745771<br>N,0,2.9372155692,-0.3540423081,-2.647281926<br>Ru,0,-1.8050428274,-0.4396914275,1.2728167932<br>O,0,-1.3983274523,-1.1740379998,2.9590307311<br>O,0,1.0677302347,-2.2760931738,1.2179590402<br>H,0,2.0035104146,-2.0765154979,-2.6893247241<br>H,0,3.0101840034,0.4672223568,-2.0345621007<br>Ti,0,0.3233516815,-1.0120437223,2.2853048645<br>O,0,2.8018831531,1.5156135617,-0.585214066<br>H,0,3.6431055333,1.5345945799,-0.1116418338<br>H,0,3.8457475398,-0.7788595393,-2.8149162319    | -1737.250555 |
| <b>I6B</b> | O,0,1.2924243801,0.491384785,2.44872913<br>Ru,0,1.4031925417,0.8152790186,0.5802591363<br>Ru,0,-0.6660369023,1.3720118153,-0.0047396616<br>Ru,0,-1.077868618,-0.7862966643,-0.9906862213<br>Ru,0,1.0362100468,-1.4302512646,-0.5094204042<br>N,0,1.9835893833,-1.267624017,-2.1338477312<br>N,0,2.6859530887,-0.2834579335,-2.8339016447<br>Ru,0,-1.8092584677,-0.3653616661,1.2498287434<br>O,0,-1.4573050514,-1.1311096995,2.9372359936<br>O,0,0.9870988181,-2.3186661524,1.2193822892<br>H,0,2.0054869093,-2.1142784651,-2.701472935<br>H,0,2.6376155687,0.5942756532,-2.3281311766<br>Ti,0,0.2774396904,-1.032411838,2.2800783847<br>O,0,2.9973530913,1.3152320494,-0.3454499901<br>H,0,3.6263083204,0.5975891826,-0.5024969508<br>H,0,3.6577752005,-0.5450678037,-2.9829219618    | -1737.255958 |
| <b>T6B</b> | O,0,1.4696115314,0.5270238946,2.1990970603<br>Ru,0,1.3068206951,0.8090256286,0.3273084229<br>Ru,0,-0.8390743791,1.3131004922,-0.0184015456<br>Ru,0,-1.2897205279,-0.8750528467,-0.9123948281<br>Ru,0,0.7995436966,-1.4951269052,-0.5726035601<br>N,0,1.9097298488,-1.5776294393,-2.200739155<br>N,0,1.835736455,-0.7318883704,-3.3196857736<br>Ru,0,-1.7692257562,-0.3913859117,1.4422888492<br>O,0,-1.1757592608,-1.1168636015,3.0631542912<br>O,0,1.0256756194,-2.3914375309,1.1300855873<br>H,0,2.8958867531,-1.7171015718,-1.9894185171<br>H,0,0.9033762075,-0.782300719,-3.7076772441<br>Ti,0,0.4608187507,-1.0122407725,2.1727753197<br>O,0,2.7084745507,1.2588807196,-0.8676520194<br>H,0,3.2896966738,0.5412197748,-1.1506666548<br>H,0,2.0478391421,0.238051159,-3.0899182328 | -1737.239131 |
| <b>I7B</b> | O,0,1.4585218641,-0.6547243494,1.9843284554<br>Ru,0,1.6133176994,0.7768671112,0.695267379<br>Ru,0,-0.3163851076,1.840630579,0.6184201117                                                                                                                                                                                                                                                                                                                                                                                                                                                                                                                                                                                                                                               | -1737.263523 |

|            |                                                                                                                                                                                                                                                                                                                                                                                                                                                                                                                                                                                                                                                                                                                                                                                      |              |
|------------|--------------------------------------------------------------------------------------------------------------------------------------------------------------------------------------------------------------------------------------------------------------------------------------------------------------------------------------------------------------------------------------------------------------------------------------------------------------------------------------------------------------------------------------------------------------------------------------------------------------------------------------------------------------------------------------------------------------------------------------------------------------------------------------|--------------|
|            | Ru,0,-1.0086721704,0.5237230788,-1.2940483032<br>Ru,0,0.8777891187,-0.65693476,-1.2861099967<br>N,0,2.4367301525,-0.2819983653,-2.4456611828<br>N,0,1.943527767,-1.5045958068,-2.9678347249<br>Ru,0,-1.7916098183,-0.0514258635,0.9128833573<br>O,0,-1.6233866566,-1.6414177199,1.8968621554<br>O,0,0.4698939849,-2.3523269981,-0.427696049<br>H,0,3.350266573,-0.435921379,-2.0218659203<br>H,0,1.6365542392,-1.4325795984,-3.9288175383<br>Ti,0,0.0999452895,-1.5521808899,1.1686900416<br>O,0,2.9636923183,1.7090044953,-0.2500877318<br>H,0,2.9828055089,1.5927378759,-1.2095208898<br>H,0,2.4854662375,-2.3439614101,-2.7926341636                                                                                                                                              |              |
| <b>T7B</b> | O,0,1.415048267,-0.2541049489,2.4884866529<br>Ru,0,1.7164179809,0.7704438706,0.8512271362<br>Ru,0,-0.1990815731,1.867208647,0.5444866259<br>Ru,0,-0.9817667349,0.0160889423,-0.8857346466<br>Ru,0,0.9548208365,-1.064659375,-0.5394875578<br>N,0,2.700294729,-0.7969060327,-1.6098373839<br>N,0,2.702947887,-0.6947156442,-3.0436377072<br>Ru,0,-1.6907007917,0.1677859002,1.368698184<br>O,0,-1.6180148979,-1.0800301417,2.7798585802<br>O,0,0.3699376976,-2.4842564246,0.6001720485<br>H,0,3.4023260654,-1.4894998952,-1.3550560719<br>H,0,1.9869063503,-1.2985067763,-3.4360592172<br>Ti,0,0.0675806128,-1.3681715775,2.0413885722<br>O,0,3.1739305341,1.1136199842,-0.1344398202<br>H,0,3.1193904507,0.2455797724,-1.0092140028<br>H,0,2.4599385864,0.2613696995,-3.2784083923   | -1737.239365 |
| <b>I8B</b> | O,0,1.5741692291,0.2462839632,1.5607096965<br>Ru,0,1.1717067909,1.2401536188,-0.0240337716<br>Ru,0,-1.0162785908,1.830006502,0.324689975<br>Ru,0,-1.7018879523,-0.1455270067,-0.950922542<br>Ru,0,0.4436871185,-0.7004033809,-1.0816520898<br>N,0,2.1317629994,-1.3867554791,-2.3457050134<br>N,0,2.7728828984,-0.3917341495,-3.1623721388<br>Ru,0,-1.740913533,-0.1414135008,1.4242787339<br>O,0,-0.9853236591,-1.4134276431,2.585444037<br>O,0,0.835820301,-2.3048542972,-0.0007474961<br>H,0,1.7999876294,-2.1279143995,-2.9558811918<br>H,0,2.7214625223,0.4925032466,-2.6649453991<br>Ti,0,0.4731333697,-1.2260255251,1.4344966104<br>O,0,2.1825192795,2.2989939059,-0.8789744278<br>H,0,2.7525682729,-1.8159507006,-1.660335647<br>H,0,3.7508463243,-0.629029154,-3.2974403353 | -1737.257752 |
| <b>T8B</b> | O,0,0.0158632862,-0.3704573822,-0.1302870734<br>Ru,0,-0.0208179164,-0.2965489072,1.7505697575<br>Ru,0,2.1515664324,0.2268403203,2.2064423844<br>Ru,0,2.6111046478,-2.0113965578,2.6880946291<br>Ru,0,3.2131887869,-1.1755670496,0.5107442479<br>O,0,2.7747138977,-1.7122602873,-1.2640246196<br>Ti,0,1.129399687,-1.8333078241,-0.4751874738<br>Ru,0,0.402692329,-2.5474646505,2.2415942129<br>N,0,-0.5565482185,-2.6456897834,3.8934979929<br>O,0,0.5954170046,-3.2920768074,0.4355540264<br>N,0,-1.8045136419,-3.8568439095,2.8199535104<br>O,0,-1.1349398044,0.4428968714,2.7952829947                                                                                                                                                                                            | -1737.199762 |

|             |                                                                                                                                                                                                                                                                                                                                                                                                                                                                                                                                                                                                                                                                                                                                                                                                                                                                                                 |              |
|-------------|-------------------------------------------------------------------------------------------------------------------------------------------------------------------------------------------------------------------------------------------------------------------------------------------------------------------------------------------------------------------------------------------------------------------------------------------------------------------------------------------------------------------------------------------------------------------------------------------------------------------------------------------------------------------------------------------------------------------------------------------------------------------------------------------------------------------------------------------------------------------------------------------------|--------------|
|             | H,0,-1.2542002595,-4.5745369135,2.3394050993<br>H,0,-2.1837808384,-3.2512211273,2.0891106709<br>H,0,-1.2530370107,-1.9494935518,4.1524580574<br>H,0,-0.5506244934,-3.3882672642,4.581023956                                                                                                                                                                                                                                                                                                                                                                                                                                                                                                                                                                                                                                                                                                     |              |
| <b>I9B</b>  | O,0,-0.2206247392,1.9088698258,-1.5601458729<br>Ti,0,-0.3404359311,2.2464893741,0.2862317825<br>O,0,1.1889494754,1.8544067652,0.9971595359<br>Ru,0,1.737799983,-0.0581083431,0.3306268546<br>N,0,3.148961757,0.278463451,1.6275998993<br>Ru,0,0.4127631899,0.1812034933,-1.7847563933<br>O,0,1.178748069,-0.7329863153,-2.971923715<br>Ru,0,-1.3061573862,-0.9726972084,-0.7714629863<br>Ru,0,-1.7093919304,0.3741167384,1.0694157902<br>O,0,-1.8405922333,2.2415317744,1.369994506<br>Ru,0,0.116376066,-1.2106278237,1.2290272351<br>N,0,2.8748967718,-1.3696854449,-0.4566730763<br>H,0,4.0984727552,-0.0376495442,1.4797873378<br>H,0,3.1127917012,1.1748556965,2.0955097435<br>H,0,2.7960003795,-1.66746181,-1.4208491554<br>H,0,3.6944340723,-1.7433786291,0.0032945145                                                                                                                    | -1737.288973 |
| <b>T11B</b> | O,0,0.0015254851,1.8444249771,-1.8285388035<br>Ru,0,-1.2371066024,1.5275650449,-0.4853939192<br>Ru,0,0.2946735985,1.0851554406,1.1834582073<br>Ru,0,-0.1508094357,-1.3115816252,0.9315865057<br>Ru,0,-1.4893557943,-1.0273395253,-0.806706172<br>N,0,-2.5626816056,-1.4723065836,1.0324950575<br>N,0,-1.8741530329,-2.7780132927,-1.6034006579<br>Ru,0,1.8944460078,-0.1886671399,0.1702850863<br>O,0,2.728186811,-0.1535467239,-1.5469417445<br>O,0,-0.1563249109,-0.9745091562,-2.3462190269<br>H,0,-2.8244112482,-3.1009463327,-1.7360495502<br>H,0,-1.3090028612,-2.9758962848,-2.4211320689<br>O,0,-2.6368816251,2.2212821192,0.1364437505<br>H,0,-2.957307321,-0.7794528505,1.6574289078<br>H,0,-3.025768627,-2.3679755534,1.1445258253<br>Ti,0,1.0213224042,0.2877034587,-2.0702619781<br>H,0,-3.1770133201,-0.9931497885,-0.1894107037<br>H,0,-3.1960659221,-0.6519261836,-1.1074547155 | -1738.414812 |
| <b>I11B</b> | O,0,0.0011072621,1.8200086734,-1.661210434<br>Ru,0,-1.1327149465,1.5310223739,-0.1986750055<br>Ru,0,0.4313158348,0.9475413633,1.4324143276<br>Ru,0,0.3110942792,-1.3508843149,1.0282007153<br>Ru,0,-1.3566549807,-1.1673059175,-0.6155895908<br>N,0,-2.9341624067,-1.4720710285,0.8507176591<br>N,0,-1.8197107036,-2.8202976463,-1.4373343089<br>Ru,0,2.1390917008,-0.1203467749,0.1391026027<br>O,0,2.7970502452,0.0465528144,-1.6179931815<br>O,0,-0.0410460224,-1.0808636254,-2.2368755254<br>H,0,-2.4220505986,-3.5478336173,-1.0738962627<br>H,0,-1.282304391,-3.1221174616,-2.240433752<br>O,0,-2.3030995133,2.4671091119,0.5880126982<br>H,0,-2.910511243,-0.7543714854,1.5684423905<br>H,0,-2.9034981772,-2.3753885152,1.3137563108<br>Ti,0,0.9970240965,0.2825010489,-1.9958855951<br>H,0,-3.8315564386,-1.4001510151,0.3788086811<br>H,0,-2.114682997,0.3233600162,-0.9837447291      | -1738.461986 |
| <b>T12B</b> | O,0,-0.0659136959,1.6465262171,-1.8083310105                                                                                                                                                                                                                                                                                                                                                                                                                                                                                                                                                                                                                                                                                                                                                                                                                                                    | -1738.440643 |

|             |                                                                                                                                                                                                                                                                                                                                                                                                                                                                                                                                                                                                                                                                                                                                                                                                                                                                                               |              |
|-------------|-----------------------------------------------------------------------------------------------------------------------------------------------------------------------------------------------------------------------------------------------------------------------------------------------------------------------------------------------------------------------------------------------------------------------------------------------------------------------------------------------------------------------------------------------------------------------------------------------------------------------------------------------------------------------------------------------------------------------------------------------------------------------------------------------------------------------------------------------------------------------------------------------|--------------|
|             | Ru,0,-1.1996867339,1.2325671976,-0.387407748<br>Ru,0,0.2659073373,1.2544012239,1.3463928697<br>Ru,0,0.4391086194,-1.0928940143,1.3815801776<br>Ru,0,-1.1029758938,-1.1788950735,-0.4931869913<br>N,0,-2.6385910081,-1.3630236534,1.086263687<br>N,0,-2.0222049127,-2.5678616439,-1.6388772014<br>Ru,0,2.1634245547,0.1835655238,0.3294617305<br>O,0,2.9205748771,0.2020116447,-1.4142390649<br>O,0,0.2717630325,-1.3496821329,-1.9697305178<br>H,0,-2.9862948955,-2.873423739,-1.6762262971<br>H,0,-1.5797331591,-2.654816807,-2.5480535407<br>O,0,-2.725644281,1.7796595942,0.1371014368<br>H,0,-2.2818301882,-1.3938341338,2.0363742933<br>H,0,-3.2229650923,-2.1824350845,0.9469966094<br>Ti,0,1.1298111666,0.1834177026,-1.8381229768<br>H,0,-3.2200801176,-0.5282903091,1.0192069192<br>H,0,-2.5199786095,-1.0905295126,-1.2713833747                                                    |              |
| <b>I12B</b> | O,0,-0.1051432911,1.830765244,-1.644815645<br>Ru,0,-1.1779278019,1.2778070531,-0.2091967023<br>Ru,0,0.3679129855,0.9607189065,1.4450335992<br>Ru,0,0.3496613016,-1.3418205472,1.0371947667<br>Ru,0,-1.2838754257,-1.0250205847,-0.6202498556<br>N,0,-2.9201205699,-1.1205993097,0.836565156<br>N,0,-2.0291309093,-2.8583064751,-1.7420726929<br>Ru,0,2.1298438151,-0.0840731571,0.0903736954<br>O,0,2.7542964041,0.1750668451,-1.6961210301<br>O,0,-0.0773331371,-1.1363476396,-2.2468934224<br>H,0,-2.0422647888,-3.7480225914,-1.2565825853<br>H,0,-1.2666578876,-2.8492038164,-2.4207034145<br>O,0,-2.6609304581,1.7834409207,0.5112778976<br>H,0,-2.6575547834,-1.3888413921,1.7793507722<br>H,0,-3.6914795008,-1.7148029148,0.5490648897<br>Ti,0,0.9406972462,0.2972301633,-1.9510715705<br>H,0,-3.2532281735,-0.1487294337,0.8867278668<br>H,0,-2.9062840256,-2.7498002706,-2.240836725 | -1738.507969 |
| <b>T9B</b>  | O,0,1.3343229441,-0.4792705908,2.2171456443<br>Ru,0,1.5562771185,0.8387510311,0.8276776425<br>Ru,0,-0.3950000332,1.8122561749,0.5089110806<br>Ru,0,-0.839172171,0.436345492,-1.425502515<br>Ru,0,1.1659229795,-0.5599011398,-1.26279693<br>N,0,2.409444361,-0.0162595808,-2.4410792542<br>N,0,1.5185585635,-1.8009357976,-3.0245602765<br>Ru,0,-1.7571993816,-0.1851737139,0.711872631<br>O,0,-1.6209485093,-1.7198200774,1.7828462581<br>O,0,0.7852774943,-2.1704996537,-0.2933209959<br>H,0,3.3634056312,-0.3743111028,-2.4847703095<br>H,0,1.5671673759,-1.4240943351,-3.9613140395<br>Ti,0,0.1714374397,-1.5212421798,1.29463531<br>O,0,2.9711148525,1.7589709196,0.0087805772<br>H,0,3.1689301494,1.5014343769,-0.9073444033<br>H,0,2.1789181855,-2.5613538228,-2.89900742                                                                                                               | -1737.218313 |
| <b>I10B</b> | O,0,1.1363598024,-0.4960514834,2.2966759804<br>Ru,0,1.320239099,0.7735162552,0.871722767<br>Ru,0,-0.6364031355,1.6068426133,0.3297591264<br>Ru,0,-0.8973389478,0.2796001688,-1.5825038244<br>Ru,0,1.2049535439,-0.7247623161,-1.3405826829<br>N,0,2.5083386703,0.170961949,-2.0628584526                                                                                                                                                                                                                                                                                                                                                                                                                                                                                                                                                                                                      | -1737.251973 |

|             |                                                                                                                                                                                                                                                                                                                                                                                                                                                                                                                                                                                                                                                                                                                                                                                                 |              |
|-------------|-------------------------------------------------------------------------------------------------------------------------------------------------------------------------------------------------------------------------------------------------------------------------------------------------------------------------------------------------------------------------------------------------------------------------------------------------------------------------------------------------------------------------------------------------------------------------------------------------------------------------------------------------------------------------------------------------------------------------------------------------------------------------------------------------|--------------|
|             | N,0,0.6639990309,-2.0700140309,-2.6491563007<br>Ru,0,-1.8204912188,-0.5901072067,0.4906283199<br>O,0,-1.5980835651,-2.0748628438,1.5806809159<br>O,0,1.100666743,-2.2866673684,-0.1592601448<br>H,0,3.389226849,-0.2653835302,-2.3510072592<br>H,0,0.0983745257,-1.9150268743,-3.4718259557<br>Ti,0,0.2148751547,-1.6906059026,1.2905003163<br>O,0,2.7272039924,1.7560844694,0.1551989949<br>H,0,2.9901861916,1.4859928916,-0.7512126944<br>H,0,0.5664062645,-3.0073837909,-2.2810451063                                                                                                                                                                                                                                                                                                        |              |
| <b>T10B</b> | O,0,1.1978237607,-0.288230309,2.1888159198<br>Ru,0,1.5750957332,0.8855162765,0.7395626924<br>Ru,0,-0.4090394304,1.6375449869,0.0575901516<br>Ru,0,-0.3029255166,-0.0726341769,-1.8561935453<br>Ru,0,1.7204320444,-0.6476630757,-1.095358754<br>N,0,3.1150330994,0.2507964946,-1.7997589443<br>N,0,0.7324505055,-1.6624338479,-2.8011728209<br>Ru,0,-1.5084609862,-0.465791281,0.0955779838<br>O,0,-1.521786944,-1.8579010626,1.3806699362<br>O,0,1.2221539646,-2.3319815869,-0.0633022205<br>H,0,3.4119382725,0.4581314455,-2.7519768106<br>H,0,1.0810334175,-1.6127190237,-3.7520111409<br>Ti,0,0.3222526506,-1.6405191958,1.288806404<br>O,0,2.9546868092,1.823012611,0.0648270425<br>H,0,3.2792944564,1.2357975398,-0.8943068281<br>H,0,0.5156920333,-2.6248506443,-2.5710326158             | -1737.269895 |
| <b>T4C</b>  | O,0,-0.4730382519,1.6028663194,-2.2498281078<br>Ru,0,-0.4088011167,1.4636656085,-0.2077497713<br>Ru,0,0.817130351,1.4687880274,1.6074563922<br>Ru,0,0.6164830354,-0.882830825,1.7939573078<br>Ru,0,-0.9457357836,-0.8640388731,-0.0461144814<br>N,0,-2.803407895,-0.7964640135,0.1689137363<br>N,0,-3.5771163662,-1.6768353324,-0.3851683974<br>Ru,0,1.7011370785,-0.1091930857,-0.1703886977<br>O,0,1.898565359,-0.3684337567,-2.0580903818<br>O,0,-1.0194054823,-1.3454496558,-2.0356951455<br>H,0,-3.2094786523,-2.3795520194,-1.0239740053<br>H,0,-4.5810294931,-1.5816165433,-0.296783281<br>O,0,-2.5270073401,2.0846796645,-0.2981966218<br>H,0,-2.6546403589,2.1720485616,-1.2558375251<br>H,0,-2.9457650538,1.2346207121,-0.0349469459<br>Ti,0,0.1423899701,-0.0644757886,-2.4669280743 | -1737.221056 |
| <b>I5C</b>  | O,0,-0.1743367093,1.8761514824,-2.1007868148<br>Ru,0,-0.520018754,1.3657901988,-0.150938895<br>Ru,0,0.3860171194,0.8918799591,1.7946351839<br>Ru,0,0.2823829671,-1.4258284152,1.2946807005<br>Ru,0,-1.0620721299,-0.9194230257,-0.6042725816<br>N,0,-2.8601653885,-0.7140239219,-0.3719640511<br>N,0,-3.7466177067,-1.6478490878,-0.0414328576<br>Ru,0,1.6648575176,-0.1433640488,-0.1479326452<br>O,0,2.2720905719,0.0186849655,-1.9438319063<br>O,0,-0.5229631819,-1.1625491908,-2.5025646644<br>H,0,-3.4261364855,-2.5503636319,0.2941652068<br>H,0,-4.6216048309,-1.3176568866,0.3425217008<br>O,0,-2.5823580251,1.9879932429,-0.4665709765<br>H,0,-2.6200846096,2.3391378232,-1.368369935<br>H,0,-2.9867682621,1.0684828215,-0.4808634295                                                  | -1737.232257 |



|            |                                                                                                                                                                                                                                                                                                                                                                                                                                                                                                                                                                                                                                                                                                                                                                                            |              |
|------------|--------------------------------------------------------------------------------------------------------------------------------------------------------------------------------------------------------------------------------------------------------------------------------------------------------------------------------------------------------------------------------------------------------------------------------------------------------------------------------------------------------------------------------------------------------------------------------------------------------------------------------------------------------------------------------------------------------------------------------------------------------------------------------------------|--------------|
|            | Ti,0,0.5480579076,0.2907127152,-2.505846035                                                                                                                                                                                                                                                                                                                                                                                                                                                                                                                                                                                                                                                                                                                                                |              |
| <b>T5C</b> | O,0,-0.1810032116,-0.0817389289,-0.0577395062<br>O,0,0.9050844056,0.1323407053,2.865674919<br>Ru,0,2.208583177,-1.0409461694,2.0088245138<br>Ru,0,-0.0260094734,-2.9047499145,1.7600448971<br>O,0,-1.4709131521,-1.7456184297,2.1887648665<br>Ru,0,1.2763011708,-1.5029518446,-0.1566534481<br>Ru,0,1.6637969224,-3.6469612465,-0.0009196084<br>Ru,0,2.2299255834,-3.4085504491,2.2940809306<br>N,0,3.6824934623,-0.2936237934,1.2322413869<br>N,0,4.9544467381,-0.1814461737,1.6878273563<br>H,0,5.0713203717,-0.2712767156,2.6912673321<br>H,0,5.4529668039,0.6103920237,1.2993223471<br>O,0,2.7061074656,-0.2554244028,-1.0354150013<br>H,0,3.338747808,-0.1051579956,-0.0536461043<br>H,0,2.3347246705,0.566467701,-1.3816148397<br>Ti,0,-0.4221167422,-0.3259063662,1.6943619586      | -1737.232582 |
| <b>I6C</b> | O,0,0.2450109712,1.8798872718,-2.1072018661<br>Ru,0,-0.7773062608,1.6345484501,-0.5308707435<br>Ru,0,0.6140264597,1.1894212454,1.129636494<br>Ru,0,0.126990608,-1.1319401726,1.1233203239<br>Ru,0,-1.2970801052,-0.8548914223,-0.6382325593<br>N,0,-3.0343489186,-0.6192804448,-0.0138142784<br>N,0,-4.0024125816,-1.6305356752,0.0004035571<br>Ru,0,2.0330417754,-0.3474035198,-0.192588486<br>O,0,2.5665429892,-0.3691991162,-1.999272345<br>O,0,-0.475804726,-1.1881826227,-2.3369659844<br>H,0,-3.5859871508,-2.5219568695,0.2409073374<br>H,0,-4.4986019201,-1.7050766562,-0.8845232533<br>O,0,-2.6182230755,2.0665046055,-0.1484185369<br>H,0,-2.7093287536,2.9648792883,0.1964213755<br>H,0,-3.4450047685,0.3087829097,0.0743503384<br>Ti,0,0.7990744573,0.1216407286,-2.2085123732 | -1737.262153 |
| <b>T6C</b> | O,0,0.4469273417,2.1292145342,-1.4358599967<br>Ru,0,-0.7126154308,1.5132086736,-0.0258777038<br>Ru,0,0.5141771108,0.7865548546,1.633367013<br>Ru,0,0.1643586569,-1.500604454,1.1110159724<br>Ru,0,-1.0740128174,-0.893204957,-0.720425034<br>N,0,-2.9110834869,-0.855546158,-0.4298867086<br>N,0,-3.7658127477,-1.9325368112,-0.7190222742<br>Ru,0,2.146080412,-0.3953548024,0.2090629037<br>O,0,2.8656126874,0.0174989138,-1.4708687254<br>O,0,-0.0763842487,-0.8552401088,-2.3345311261<br>H,0,-3.3791012987,-2.7979148288,-0.3625096939<br>H,0,-3.9524722369,-2.0207376554,-1.7146885306<br>Ti,0,1.0959165401,0.4689157215,-1.8056591744<br>O,0,-2.5850376657,1.8288752659,0.408061343<br>H,0,-2.8993553379,1.499420989,1.2571315166<br>H,0,-3.4115004781,0.0258368229,-0.3420507806    | -1737.254159 |
| <b>I7C</b> | O,0,0.2960711124,2.0660575328,-1.5767208183<br>Ru,0,-0.8336096411,1.5369884667,-0.0954167856<br>Ru,0,0.4079493227,0.8401183951,1.5807850483<br>Ru,0,0.0522529908,-1.4531697853,1.0592935723<br>Ru,0,-1.1777689164,-0.8790162057,-0.7686187242<br>N,0,-3.0601102926,-0.8803210636,-0.6469712677<br>N,0,-3.7669558528,-2.0707061648,-0.9338585401                                                                                                                                                                                                                                                                                                                                                                                                                                            | -1737.259309 |

|            |                                                                                                                                                                                                                                                                                                                                                                                                                                                                                                                                                                                                                                                                                                                                                                                                |              |
|------------|------------------------------------------------------------------------------------------------------------------------------------------------------------------------------------------------------------------------------------------------------------------------------------------------------------------------------------------------------------------------------------------------------------------------------------------------------------------------------------------------------------------------------------------------------------------------------------------------------------------------------------------------------------------------------------------------------------------------------------------------------------------------------------------------|--------------|
|            | Ru,0,2.0494294004,-0.3300770597,0.1718370112<br>O,0,2.775842968,0.0414714173,-1.5212328538<br>O,0,-0.1528991193,-0.9641764936,-2.3455991083<br>H,0,-3.5307610403,-2.7904910057,-0.2630032665<br>H,0,-3.601606157,-2.4064023816,-1.8788833675<br>Ti,0,0.9955700607,0.4171912234,-1.8681273382<br>O,0,-2.599419794,1.7709607819,0.5564663318<br>H,0,-3.1143009572,0.9657104002,0.7037072669<br>H,0,-3.6359230844,-0.0790290573,-0.8816361603                                                                                                                                                                                                                                                                                                                                                     |              |
| <b>T7C</b> | O,0,0.2188691359,2.0635463196,-1.143650853<br>Ru,0,-0.989585579,1.2621353142,0.1657371625<br>Ru,0,0.3772142313,0.3738551427,1.6845989644<br>Ru,0,0.2922900354,-1.7598786531,0.4488629096<br>Ru,0,-1.0715819717,-0.8225065987,-1.0673640737<br>N,0,-3.1262331768,-0.664982786,-0.9271576096<br>N,0,-3.9462835044,-1.7630217913,-0.4931349978<br>Ru,0,2.1376277367,-0.2995746583,0.1878185797<br>O,0,2.9216199381,0.4462427949,-1.356268071<br>O,0,0.1079157183,-0.6908701115,-2.5667386779<br>H,0,-3.9256565257,-1.7746126592,0.5206259232<br>H,0,-3.5525571903,-2.6406539687,-0.8186280979<br>Ti,0,1.1254022738,0.6503602568,-1.8058430672<br>O,0,-2.7605493276,1.3571254124,0.4262550459<br>H,0,-3.1742372208,0.3587907498,-0.1707713226<br>H,0,-3.5304955732,-0.3108457636,-1.7923218147     | -1737.239370 |
| <b>I8C</b> | O,0,-0.362720638,2.1313495242,-0.5949361784<br>Ru,0,-1.0674061848,1.0346667721,0.8061078666<br>Ru,0,0.8428599188,0.3457276724,1.8745446594<br>Ru,0,0.8175307166,-1.6903364416,0.5054812682<br>Ru,0,-0.9348092591,-0.8377995345,-0.5655512963<br>N,0,-2.9695949844,-1.1404327724,-1.3329158753<br>N,0,-4.1289578996,-1.0243413487,-0.4541908829<br>Ru,0,2.2421508876,0.1327708133,-0.024744902<br>O,0,2.4349132484,0.9910971317,-1.6883746698<br>O,0,-0.4811338311,-0.3444053276,-2.4233283245<br>H,0,-3.9611169987,-0.1900811033,0.1078673067<br>H,0,-4.0527439993,-1.7930428387,0.2066554714<br>Ti,0,0.5692033433,0.9412449174,-1.6476263546<br>O,0,-2.4822097734,1.2725981631,1.7105871545<br>H,0,-3.0807397301,-0.4375433847,-2.0617308921<br>H,0,-3.0632478163,-2.0273802427,-1.8229753512 | -1737.256312 |
| <b>I1D</b> | O,0,2.2483046114,-0.0933728461,2.0276277505<br>Ru,0,0.9116262412,0.8437352911,0.7126754014<br>Ru,0,-1.3206685357,1.5518373634,0.4363534258<br>Ru,0,-1.5022772436,0.4147746479,-1.4318376484<br>Ru,0,0.6515352612,-0.3776730936,-1.2743976102<br>N,0,1.9751235589,-1.2217900161,-2.654172931<br>N,0,1.7759230659,-2.0840874568,-1.9063254609<br>Ru,0,-0.908045719,-0.8965129152,0.7317482419<br>O,0,-0.1307423924,-2.044902505,2.1603302276<br>O,0,2.5531399089,-3.066899704,0.4817611209<br>H,0,3.4403650319,-3.3785034384,0.6879422294<br>H,0,2.4283086752,-3.0572258108,-0.4963100512<br>Ti,0,1.3951228238,-1.5146140136,1.4114067753<br>O,0,2.5891062751,2.4069082872,0.7708015711<br>H,0,3.0180149458,2.5461044987,-0.0811152504<br>H,0,3.1798594915,1.8554947112,1.3097662081             | -1737.271191 |

|            |                                                                                                                                                                                                                                                                                                                                                                                                                                                                                                                                                                                                                                                                                                                                                                                   |              |
|------------|-----------------------------------------------------------------------------------------------------------------------------------------------------------------------------------------------------------------------------------------------------------------------------------------------------------------------------------------------------------------------------------------------------------------------------------------------------------------------------------------------------------------------------------------------------------------------------------------------------------------------------------------------------------------------------------------------------------------------------------------------------------------------------------|--------------|
| <b>T1D</b> | O,0,2.2837580199,-0.2036870934,1.9354853009<br>Ru,0,0.9905219388,0.708453739,0.6048686058<br>Ru,0,-1.2282869359,1.4387289638,0.3847298277<br>Ru,0,-1.4882249532,0.3554189184,-1.5007421722<br>Ru,0,0.6858638232,-0.4502788357,-1.412277236<br>N,0,2.1711598154,-1.3287533483,-2.5650096506<br>N,0,1.7763131692,-2.0905330306,-1.7348446263<br>Ru,0,-0.8293697772,-1.0191010138,0.6171006181<br>O,0,-0.095081444,-2.1764068298,2.0182933393<br>O,0,2.5417576907,-3.0587582166,0.379474081<br>H,0,3.4306092133,-3.3811418571,0.5509981988<br>H,0,2.2505148766,-2.8172015099,-0.9999053372<br>Ti,0,1.4982196956,-1.6878432052,1.3555410094<br>O,0,2.6889467172,2.2341840057,0.6651945617<br>H,0,3.1339034438,2.3690113095,-0.179369537<br>H,0,3.2686097066,1.6843930041,1.2186710167 | -1737.256397 |
| <b>I2D</b> | O,0,2.179666796,-0.0418291894,2.0416414467<br>Ru,0,0.9132922069,0.8274661585,0.6725403825<br>Ru,0,-1.2821920909,1.5539347693,0.4510876753<br>Ru,0,-1.5411077048,0.4283049102,-1.4115460219<br>Ru,0,0.6338267463,-0.3663915694,-1.3081450162<br>N,0,1.9503944336,-1.1396718907,-2.654987374<br>N,0,1.5738923103,-2.0175267826,-1.9032804161<br>Ru,0,-0.896010662,-0.9092786507,0.7292611425<br>O,0,-0.1966684728,-2.0441926503,2.140610128<br>O,0,2.5464416362,-2.9371725353,0.8610972925<br>H,0,3.5060284475,-2.9850233606,0.8603457867<br>H,0,2.0094038323,-2.9420151106,-1.7877961602<br>Ti,0,1.4518428927,-1.5898544923,1.5526902652<br>O,0,2.6163173265,2.3454173407,0.7602557194<br>H,0,3.0831572913,2.478075756,-0.0726900948<br>H,0,3.175524011,1.7892252973,1.3296842445  | -1737.258394 |
| <b>T2D</b> | O,0,1.9611237185,-0.1459549958,2.267481179<br>Ru,0,0.8215085366,1.0347175747,0.9944022833<br>Ru,0,-1.239243085,1.7241565423,0.6821338761<br>Ru,0,-1.3395357475,0.5384561211,-1.3310135521<br>Ru,0,0.7968962861,-0.1769361952,-1.1420399342<br>N,0,2.3336261393,-0.6513380497,-2.4571505592<br>N,0,1.994624076,-1.6312284844,-1.8410571986<br>Ru,0,-0.9368014079,-0.8084274613,0.783031354<br>O,0,-0.3093249841,-2.1565623666,1.996584039<br>O,0,2.5877456225,-2.9046638973,0.9291357639<br>H,0,3.5412461546,-2.9481646509,1.0391503082<br>H,0,2.4242013425,-2.5639706885,-1.90512516<br>Ti,0,1.3805617772,-1.6317007706,1.5600494699<br>O,0,2.5137077769,2.0158261992,0.387009288<br>H,0,1.9266264718,1.0708426406,-0.5996945164<br>H,0,3.2668463225,1.6844184824,0.8978753592    | -1737.215994 |
| <b>I3D</b> | O,0,1.7393460968,-0.2906732698,2.3368935766<br>Ru,0,1.2493852102,0.7585235165,0.8491589463<br>Ru,0,-0.985739894,1.4141189971,0.6390899175<br>Ru,0,-1.1434447766,0.602519419,-1.3877033564<br>Ru,0,0.9862788017,-0.3329393306,-1.2916060297<br>N,0,2.1413986524,-0.8601909239,-2.917275303<br>N,0,1.8016796891,-1.8672739997,-2.3260632137<br>Ru,0,-0.7390370706,-1.0756030911,0.5494840909<br>O,0,-0.4542273523,-2.435143584,1.904063704                                                                                                                                                                                                                                                                                                                                          | -1737.249270 |

|            |                                                                                                                                                                                                                                                                                                                                                                                                                                                                                                                                                                                                                                                                                                                                                                                   |              |
|------------|-----------------------------------------------------------------------------------------------------------------------------------------------------------------------------------------------------------------------------------------------------------------------------------------------------------------------------------------------------------------------------------------------------------------------------------------------------------------------------------------------------------------------------------------------------------------------------------------------------------------------------------------------------------------------------------------------------------------------------------------------------------------------------------|--------------|
|            | O,0,2.435520452,-3.1968131552,1.0672994851<br>H,0,3.3936637093,-3.2220733353,1.009237894<br>H,0,2.0759936305,-2.8112624286,-2.6369749224<br>Ti,0,1.2431368074,-1.9286906734,1.6890183673<br>O,0,2.4824575244,2.2035857108,0.6907695806<br>H,0,1.2676040756,1.2233912888,-1.5800704186<br>H,0,2.2631864443,2.9776688594,1.2276036817                                                                                                                                                                                                                                                                                                                                                                                                                                               |              |
| <b>T3D</b> | O,0,1.833461881,-0.3231638059,2.4335012735<br>Ru,0,1.222070105,0.7763018832,1.0413450861<br>Ru,0,-1.0215041546,1.4860476917,0.7127867599<br>Ru,0,-1.1326367672,0.5444395059,-1.2332257033<br>Ru,0,0.9964822898,-0.4472204266,-1.0393616759<br>N,0,1.8537803966,-0.3980726167,-2.8603810309<br>N,0,2.2204411108,-1.4928829088,-2.3788063359<br>Ru,0,-0.7313889025,-1.0181147589,0.7951809319<br>O,0,-0.3480166426,-2.4148737794,2.0934959685<br>O,0,2.5294298059,-3.2799353257,1.3094323962<br>H,0,2.514337698,-4.193023373,1.0172710206<br>H,0,2.4909135726,-2.216123914,-3.0526295079<br>Ti,0,1.3337365179,-1.9464507057,1.7168928368<br>O,0,2.1685592265,2.3080093152,0.4079711884<br>H,0,1.9435431537,0.6281615333,-1.9384900708<br>H,0,1.8839927092,3.1460456855,0.797942863  | -1737.213148 |
| <b>I4D</b> | O,0,2.0678291863,-0.4143368476,1.5448320033<br>Ru,0,1.093989695,0.9688639709,0.7308423303<br>Ru,0,-1.1692964205,1.5473621374,0.9085857683<br>Ru,0,-1.5598163122,0.9793403001,-1.1811562614<br>Ru,0,0.5822379375,0.1460401183,-1.4141348936<br>N,0,2.1619879162,-0.7107132791,-2.419995311<br>N,0,1.6166311076,-1.6257973772,-1.5386858121<br>Ru,0,-0.7837620922,-0.8930131461,0.4243156897<br>O,0,0.0704507466,-2.5377346774,1.0596746751<br>O,0,2.919818613,-3.2475746827,0.8875704846<br>H,0,3.014517927,-4.1630863119,1.1554639863<br>H,0,1.0601301526,-2.2934817781,-2.0681496604<br>Ti,0,1.6788411618,-1.9495352661,0.5996575635<br>O,0,2.0233431143,2.6172137722,0.4367002252<br>H,0,3.0174290236,-0.3292870224,-2.0143918533<br>H,0,1.9209642434,3.2617610898,1.1512980656 | -1737.280734 |
| <b>T4D</b> | O,0,2.1285812265,-0.2552013605,1.211227757<br>Ru,0,0.9415196539,1.0622075797,0.4066334542<br>Ru,0,-1.2285552674,1.6086913296,0.6886237906<br>Ru,0,-1.8166744117,0.6920684397,-1.2667704708<br>Ru,0,0.3534845433,-0.0151170012,-1.543949039<br>N,0,2.074581321,-0.7370105127,-2.4509441999<br>N,0,1.5994055279,-1.6709538347,-1.5557689645<br>Ru,0,-0.8602088653,-0.8795237773,0.4874133104<br>O,0,0.1043632126,-2.4540000102,1.0988438022<br>O,0,3.0009324772,-3.1223009151,0.9713805806<br>H,0,3.0457553118,-4.0323667025,1.2715921637<br>H,0,1.1351446213,-2.4169652816,-2.0707556682<br>Ti,0,1.719910694,-1.8879842275,0.581811202<br>O,0,2.27901005,2.4468037647,0.5312869792<br>H,0,2.8656321161,-0.2544198322,-2.0237739212<br>H,0,1.9395723987,3.3127923318,0.7860681235   | -1737.277641 |
| <b>I5D</b> | O,0,2.172161554,-0.4797096848,1.5066560666<br>Ru,0,1.2016664044,0.9420489719,0.7340164172                                                                                                                                                                                                                                                                                                                                                                                                                                                                                                                                                                                                                                                                                         | -1737.282919 |

|            |                                                                                                                                                                                                                                                                                                                                                                                                                                                                                                                                                                                                                                                                                                                                                                                          |              |
|------------|------------------------------------------------------------------------------------------------------------------------------------------------------------------------------------------------------------------------------------------------------------------------------------------------------------------------------------------------------------------------------------------------------------------------------------------------------------------------------------------------------------------------------------------------------------------------------------------------------------------------------------------------------------------------------------------------------------------------------------------------------------------------------------------|--------------|
|            | Ru,0,-1.0622163952,1.6456478174,0.8683472367<br>Ru,0,-1.4372139741,1.0420158383,-1.2008763644<br>Ru,0,0.6698472254,0.1183687466,-1.4231120642<br>N,0,2.1862538179,-0.8228249925,-2.4521194565<br>N,0,1.6043820026,-1.7016363353,-1.5546070473<br>Ru,0,-0.719171485,-0.8160888804,0.4495635894<br>O,0,0.0787550576,-2.4797257549,1.1132085429<br>O,0,2.8916073612,-3.3472279283,0.8497500809<br>H,0,2.9659235348,-4.2595173485,1.1336430706<br>H,0,1.0060237407,-2.3439211641,-2.0694208124<br>Ti,0,1.7036015337,-1.9956141012,0.5861270745<br>O,0,1.8204567236,2.7453292976,0.5652174025<br>H,0,3.0703707719,-0.4962427239,-2.0611676897<br>H,0,2.2315411665,2.9605487821,-0.2821658867                                                                                                  |              |
| <b>T5D</b> | O,0,1.869493085,-0.3340694642,2.3054342765<br>Ru,0,1.0693196739,0.8786259974,1.118755878<br>Ru,0,-1.1939554055,1.344953761,0.9932533636<br>Ru,0,-1.2621062499,0.6742577121,-1.1375412075<br>Ru,0,0.8694565257,-0.0212640813,-1.0931292356<br>N,0,2.0588212283,-0.5790103344,-2.6526164948<br>N,0,1.726572468,-1.7041221257,-1.9577465709<br>Ru,0,-0.7214924126,-1.1106372567,0.651962436<br>O,0,-0.1554554164,-2.5895840664,1.7500928176<br>O,0,2.7796024465,-2.9488284426,0.705035181<br>H,0,2.902024609,-3.1842972993,-0.2220140329<br>H,0,0.9252040995,-2.1267579452,-2.4334706618<br>Ti,0,1.4742378163,-1.9027970386,1.4282787171<br>O,0,1.8578338492,2.598919522,0.950638305<br>H,0,3.0143163914,-0.3280395338,-2.3803357837<br>H,0,2.5014212917,2.6886705958,0.2358270123          | -1737.255744 |
| <b>I6D</b> | O,0,1.7222043259,-0.2480221613,2.0463420738<br>Ru,0,0.9207316865,0.8797688413,0.7852820838<br>Ru,0,-1.3354933667,1.3639740847,0.7284276396<br>Ru,0,-1.495428622,0.5734453441,-1.3609968756<br>Ru,0,0.6265035681,-0.1289978814,-1.3640500724<br>N,0,1.7671694217,-0.7084725585,-2.9458871909<br>N,0,1.4649056918,-1.8266025727,-2.2264826329<br>Ru,0,-0.9234705777,-1.1132191758,0.5114468645<br>O,0,-0.4062849932,-2.5348442251,1.7017419348<br>O,0,2.3679586488,-2.8516685052,0.3044142843<br>H,0,2.3284715673,-2.8104283997,-0.6713439908<br>H,0,0.6608202105,-2.2733049844,-2.6732898538<br>Ti,0,1.2404356476,-1.8925357217,1.3493165948<br>O,0,1.7396784462,2.5654431216,0.4826404253<br>H,0,2.7301978788,-0.4477702834,-2.7130320835<br>H,0,2.3687714664,2.5887330774,-0.2501942009 | -1737.255452 |
| <b>T6D</b> | O,0,1.9530564189,-0.1641858347,2.0569009687<br>Ru,0,1.1314954945,0.9348437524,0.8080755521<br>Ru,0,-1.1353399055,1.4560424835,0.7923469954<br>Ru,0,-1.3425522184,0.7183323594,-1.2916472208<br>Ru,0,0.7833776914,-0.0330560011,-1.3466671164<br>N,0,2.1707198195,-0.6787203318,-2.6889595401<br>N,0,1.7136474728,-1.7614277462,-1.974838493<br>Ru,0,-0.7112788806,-1.0088637838,0.5519042425<br>O,0,-0.2320599074,-2.4743317696,1.6701990422<br>O,0,2.423701308,-2.6289801137,0.2165554858<br>H,0,2.2111507967,-2.2858351701,-0.9542220885                                                                                                                                                                                                                                               | -1737.248979 |

|            |                                                                                                                                                                                                                                                                                                                                                                                                                                                                                                                                                                                                                                                                                                                                                                                          |              |
|------------|------------------------------------------------------------------------------------------------------------------------------------------------------------------------------------------------------------------------------------------------------------------------------------------------------------------------------------------------------------------------------------------------------------------------------------------------------------------------------------------------------------------------------------------------------------------------------------------------------------------------------------------------------------------------------------------------------------------------------------------------------------------------------------------|--------------|
|            | H,0,1.0771016823,-2.3281935578,-2.529350739<br>Ti,0,1.4801699251,-1.8819477743,1.4589573528<br>O,0,1.8834991271,2.6494603487,0.4630823751<br>H,0,3.0934349876,-0.42672562,-2.328750177<br>H,0,2.507394188,2.669560759,-0.2749176396                                                                                                                                                                                                                                                                                                                                                                                                                                                                                                                                                      |              |
| <b>I7D</b> | O,0,1.8063943985,-0.2362189859,2.0014485894<br>Ru,0,0.9646368396,0.8248636205,0.7584568435<br>Ru,0,-1.3035823407,1.3482999953,0.7701214256<br>Ru,0,-1.5307784371,0.6638182977,-1.3283373519<br>Ru,0,0.5834994047,-0.1140455448,-1.408506858<br>N,0,2.0297536296,-0.6994547507,-2.7113372374<br>N,0,1.5759483359,-1.8198279508,-2.0302131705<br>Ru,0,-0.8822976202,-1.1065926256,0.4993186543<br>O,0,-0.4192839701,-2.5735120324,1.5883583742<br>O,0,2.3181528278,-2.7801984787,0.3615142265<br>H,0,2.1035158948,-2.2751807446,-1.2450110336<br>H,0,1.0453545903,-2.4613487066,-2.6078438449<br>Ti,0,1.335664766,-2.0042399228,1.4766041398<br>O,0,1.6853130231,2.5501192936,0.3897710147<br>H,0,2.9553359553,-0.4549480431,-2.3603961409<br>H,0,2.3024887024,2.5667635789,-0.3540766308  | -1737.248246 |
| <b>T7D</b> | O,0,1.8402459036,-0.1528319837,2.2914339855<br>Ru,0,1.1837457755,0.9808134272,0.9865947186<br>Ru,0,-1.0494549577,1.5676128505,1.0094947915<br>Ru,0,-1.2518912727,0.6439287255,-1.1464637069<br>Ru,0,0.8343894155,-0.1226147379,-1.1253363709<br>N,0,2.2975639332,-0.3079886307,-2.4877882196<br>N,0,1.9636260562,-1.6030601418,-2.0890452703<br>Ru,0,-1.0988428904,-0.8599912349,0.8106561675<br>O,0,-0.4399096332,-2.4029037198,1.5888823627<br>O,0,2.4139902611,-2.5810488895,0.4570812109<br>H,0,2.5061115604,-2.1165676661,-1.3767728936<br>H,0,1.5548517284,-2.1701692526,-2.8204347262<br>Ti,0,1.3321422584,-1.7767873073,1.4340271259<br>O,0,2.0645845286,2.2822549625,0.167539705<br>H,0,3.2183404531,-0.0550290199,-2.1347971583<br>H,0,1.6380248801,1.4303536185,-0.9364047217 | -1737.199246 |
| <b>I8D</b> | O,0,1.8195351497,-0.5588156911,1.5572052538<br>Ru,0,1.3396458793,0.9630662859,0.6203570039<br>Ru,0,-0.9292097377,1.0944548892,1.001000106<br>Ru,0,-1.263843414,0.1471791502,-1.2518699429<br>Ru,0,0.9067575638,0.187579998,-1.573442035<br>N,0,2.0600827249,-0.620680198,-3.0150522192<br>N,0,2.142397965,-1.4706342496,-1.9073067759<br>Ru,0,-1.4769794059,-1.0995256093,0.7997872896<br>O,0,-0.9712163985,-2.6294224738,1.6915211375<br>O,0,1.5244944788,-3.1431547527,0.2015740038<br>H,0,2.998193999,-1.538962894,-1.3655306677<br>H,0,1.682885955,-2.3714641333,-1.9871050872<br>Ti,0,0.8312421379,-2.1779548652,1.3377276893<br>O,0,1.9944503936,2.51427416,0.7052438386<br>H,0,2.9550699566,-0.1746401612,-3.1971708254<br>H,0,1.0971087524,1.6394165448,-2.2224377692            | -1737.234273 |
| <b>T8D</b> | O,0,1.7108619938,-0.2899650112,1.902092032<br>Ru,0,1.1131152214,0.9792188365,0.6651583351<br>Ru,0,-1.0804891766,1.4006884159,0.9803128059<br>Ru,0,-1.5913611502,0.4872422307,-1.1321423953                                                                                                                                                                                                                                                                                                                                                                                                                                                                                                                                                                                               | -1737.192707 |

|             |                                                                                                                                                                                                                                                                                                                                                                                                                                                                                                                                                                                                                                                                                                                                                                                                                             |              |
|-------------|-----------------------------------------------------------------------------------------------------------------------------------------------------------------------------------------------------------------------------------------------------------------------------------------------------------------------------------------------------------------------------------------------------------------------------------------------------------------------------------------------------------------------------------------------------------------------------------------------------------------------------------------------------------------------------------------------------------------------------------------------------------------------------------------------------------------------------|--------------|
|             | <p>Ru,0,0.5899616599,-0.2063031132,-1.297159464<br/> N,0,2.2888779586,-0.3552306714,-2.6173602403<br/> N,0,1.8550833423,-1.6172709418,-2.2109809784<br/> Ru,0,-1.310624913,-1.0403609602,0.720272131<br/> O,0,-0.584918013,-2.6114312771,1.3950282206<br/> O,0,2.2002718848,-2.7056219705,0.181621791<br/> H,0,2.3053812226,-2.1247019158,-1.4058701582<br/> H,0,1.547211178,-2.1943089541,-2.9839473089<br/> Ti,0,1.1547925338,-1.9609788503,1.2618213136<br/> O,0,2.0343218774,2.3717652406,0.410632451<br/> H,0,3.0767940108,-0.0702880772,-2.0362313714<br/> H,0,1.4013383695,0.698263019,-2.4387471636</p>                                                                                                                                                                                                             |              |
| <b>I9D</b>  | <p>O,0,1.7534233735,-0.1806363056,1.9030420954<br/> Ru,0,1.0660896715,1.1507501779,0.8015704322<br/> Ru,0,-1.2563008789,1.1820509457,1.1668299327<br/> Ru,0,-1.6638798515,0.404046984,-1.2716069661<br/> Ru,0,0.5389876534,-0.0142936208,-1.1059127836<br/> N,0,2.8123325507,-0.7996303686,-3.1024622516<br/> N,0,1.7293664171,-1.3426106079,-2.298224542<br/> Ru,0,-1.2025181806,-1.0705809582,0.5356987279<br/> O,0,-0.3832167285,-2.6348615601,1.1981568183<br/> O,0,2.4259681356,-2.5397026716,0.0607572873<br/> H,0,2.1313545422,-1.975487192,-1.5732505436<br/> H,0,1.1685059128,-1.9265943613,-2.9137249994<br/> Ti,0,1.3116156191,-1.8504829401,1.0952096249<br/> O,0,1.7402096037,2.6695889444,0.5337575959<br/> H,0,3.6403502063,-0.7955451442,-2.5150441997<br/> H,0,2.5938329536,0.1691826784,-3.3127272286</p> | -1737.224379 |
| <b>T9D</b>  | <p>O,0,1.7990209092,-0.1254762002,1.8023841155<br/> Ru,0,1.2301889695,1.1419406167,0.5512612043<br/> Ru,0,-0.9866730922,1.4964600847,0.7817730506<br/> Ru,0,-1.5107696188,0.4163600753,-1.2118720813<br/> Ru,0,0.7775603665,-0.3601102117,-1.2393239249<br/> N,0,2.5805983308,-0.3064460691,-2.2731870722<br/> N,0,1.5466751264,-1.9260932015,-2.2922545989<br/> Ru,0,-1.3653782931,-1.1631333135,0.3009034728<br/> O,0,-0.4114877927,-2.4352260317,1.1684640088<br/> O,0,2.5849656048,-2.713063204,0.335462601<br/> H,0,2.0428888272,-2.6321112159,-1.7385119132<br/> H,0,1.6894790284,-2.0480176448,-3.2851857333<br/> Ti,0,1.381340312,-1.7384588271,0.9158174832<br/> O,0,2.1491855912,2.460078145,0.0421163386<br/> H,0,2.7065601476,-0.0599181218,-3.2470711251<br/> H,0,3.4411966331,-0.6265070605,-1.846525716</p>  | -1737.189247 |
| <b>I10D</b> | <p>O,0,1.9330896018,-0.6934979829,1.5553100178<br/> Ru,0,1.5394551647,0.798985443,0.4787790897<br/> Ru,0,-0.5950744866,1.2593363414,1.0172127007<br/> Ru,0,-1.4171918175,0.8591902237,-1.2061183731<br/> Ru,0,0.7624255759,-0.3050288233,-1.578683381<br/> N,0,1.7118977174,0.8229506395,-2.7058953767<br/> N,0,1.4710303774,-2.1790657232,-1.0792782561<br/> Ru,0,-1.4688522421,-0.962050466,-0.0575988968<br/> O,0,-0.8366670947,-2.2661979528,1.0134009801<br/> O,0,1.8004979951,-3.628055788,1.6649790012<br/> H,0,1.0779111303,-2.9333375639,-1.6378684391<br/> H,0,2.4750972638,-2.1798726076,-1.2528189454<br/> Ti,0,1.1167965596,-2.295782752,1.022424325</p>                                                                                                                                                       | -1737.303483 |

|                           |                                                                                                                                                                                                                                                                                                                                                                                                                                                                                                                                                                                                                                                                                                                                                                                                                                                                                   |              |
|---------------------------|-----------------------------------------------------------------------------------------------------------------------------------------------------------------------------------------------------------------------------------------------------------------------------------------------------------------------------------------------------------------------------------------------------------------------------------------------------------------------------------------------------------------------------------------------------------------------------------------------------------------------------------------------------------------------------------------------------------------------------------------------------------------------------------------------------------------------------------------------------------------------------------|--------------|
|                           | O,0,2.7143555693,1.9216773022,0.0141975281<br>H,0,1.6253017123,0.8520113028,-3.717774208<br>H,0,2.3317899733,1.547022407,-2.3471487666                                                                                                                                                                                                                                                                                                                                                                                                                                                                                                                                                                                                                                                                                                                                            |              |
| <b>I10D-H<sub>2</sub></b> | O,0,1.7867111903,-0.93884935,1.63809056<br>Ru,0,1.5315871889,0.6544887475,0.7143296076<br>Ru,0,-0.6027676827,1.0808266335,1.3040035254<br>Ru,0,-1.5096695015,1.1581942359,-0.940975463<br>Ru,0,0.5628505828,-0.2030148865,-1.5251612864<br>N,0,1.4710849113,1.1244682831,-2.4856422702<br>N,0,1.2404838523,-2.1429023279,-1.0383683791<br>Ru,0,-1.6802694965,-0.8081786019,-0.1019925284<br>O,0,-1.1859454753,-2.2376580216,0.8903637476<br>O,0,1.272661214,-3.843078706,1.5472670946<br>H,0,0.9170964279,-2.8704581905,-1.6678458848<br>H,0,2.2555419845,-2.1216662607,-1.1229188805<br>Ti,0,0.7531322877,-2.3981667725,1.006176745<br>O,0,2.6176621424,1.8305222616,0.189438985<br>H,0,1.3907211281,1.3105146125,-3.4785611188<br>H,0,2.0213348718,1.8308607293,-2.0032350165<br>H,0,0.1747455104,-0.9652040821,-3.1097197444<br>H,0,-0.5392461361,-0.6150883035,-2.890927693   | -1738.476539 |
| <b>T10D</b>               | O,0,1.9922435567,-0.7593712304,1.5450724745<br>Ru,0,1.7368153305,0.8801184077,0.6908920034<br>Ru,0,-0.4393032377,1.3030032057,1.1509601272<br>Ru,0,-1.2459046415,1.2720843218,-1.1469697701<br>Ru,0,0.8124006351,-0.0943700657,-1.6078981409<br>N,0,1.596535111,1.3038149434,-2.5715315287<br>N,0,1.3057104308,-2.3040974663,-1.3185653835<br>Ru,0,-1.4429686001,-0.6500967198,-0.2383928376<br>O,0,-0.9139261219,-2.101934252,0.7222090627<br>O,0,1.562878405,-3.640930511,1.4090163232<br>H,0,0.7429805706,-3.1263411538,-1.5300275003<br>H,0,2.2699963937,-2.5241113032,-1.55426427<br>Ti,0,1.0145440805,-2.2059135404,0.8680373419<br>O,0,2.7862681545,2.0635834972,0.1251630683<br>H,0,1.4296901099,1.5243000472,-3.5462178057<br>H,0,2.0875104685,2.0511274585,-2.0851365708<br>H,0,0.8177763663,-1.636217655,-2.3550875969<br>H,0,0.2099479881,-0.7665699839,-3.0110159964 | -1738.430866 |
| <b>I11D</b>               | O,0,1.8938062473,-1.0655400488,1.0964463865<br>Ru,0,1.3986651499,0.6206917261,0.4582357766<br>Ru,0,-0.5113803869,1.3190095512,1.5285115804<br>Ru,0,-1.7292969499,1.3592251141,-0.5105494577<br>Ru,0,0.2737874571,0.4278503823,-1.488556109<br>N,0,1.1182643803,1.6208713302,-2.7198865459<br>N,0,1.322816614,-3.205515882,-1.1252400435<br>Ru,0,-1.7027624995,-0.6635272496,0.2352663251<br>O,0,-1.1146753439,-2.2977368153,0.7740121763<br>O,0,1.2268726713,-3.8038662329,1.8427533776<br>H,0,0.7807631522,-4.0020784264,-1.4477502342<br>H,0,2.3051164694,-3.4603264387,-1.1796667332<br>Ti,0,0.7853617726,-2.5582302731,0.8962317898<br>O,0,2.4830229803,1.9052858183,0.2232663952<br>H,0,1.8250120825,1.3040250364,-3.3710522276<br>H,0,1.2981037185,2.577911431,-2.4371231502<br>H,0,1.1534644009,-2.4182992517,-1.7593790983<br>H,0,0.667730084,-0.7211757713,-2.5780032079 | -1738.481338 |



|                                                       |                                                                                                                                                                                                                                                                                                                                                                                                                                                                                                                                                                                                                                                                                                                                                                                                                                                                                       |              |
|-------------------------------------------------------|---------------------------------------------------------------------------------------------------------------------------------------------------------------------------------------------------------------------------------------------------------------------------------------------------------------------------------------------------------------------------------------------------------------------------------------------------------------------------------------------------------------------------------------------------------------------------------------------------------------------------------------------------------------------------------------------------------------------------------------------------------------------------------------------------------------------------------------------------------------------------------------|--------------|
| <b>T11D</b>                                           | O,0,1.8685732568,-0.9331861122,0.9687968804<br>Ru,0,1.3268142034,0.8532649313,0.6317557144<br>Ru,0,-0.5671479099,1.0815288977,1.8633681299<br>Ru,0,-1.9174108011,1.5331811837,-0.02877305<br>Ru,0,-0.0249539468,0.8226659974,-1.3097438449<br>N,0,1.3079705048,1.241333021,-2.7225229039<br>N,0,1.2213407352,-3.0201527948,-1.3169142335<br>Ru,0,-1.8152628299,-0.6048275796,0.2369348211<br>O,0,-1.0958529587,-2.2200646624,0.6896527474<br>O,0,1.3558028645,-3.7316337959,1.5837620824<br>H,0,0.7446217711,-3.8845090858,-1.5565589102<br>H,0,2.2172198538,-3.1658967658,-1.4543193155<br>Ti,0,0.812404905,-2.4285734261,0.7640198421<br>O,0,2.5599860428,2.0039907355,0.5588118661<br>H,0,2.2928822867,1.2625159731,-2.4824602121<br>H,0,1.1728353922,1.325476939,-3.7220476953<br>H,0,0.9069095488,-2.2857710147,-1.9481881985<br>H,0,0.6870300812,-0.0566354415,-2.5692027197    | -1738.442585 |
| <b>I12D</b>                                           | O,0,1.9645642179,-1.2043704357,0.3799935037<br>Ru,0,1.4099375541,0.5146770236,-0.0101980086<br>Ru,0,-0.1759926842,1.1795714053,1.4561524131<br>Ru,0,-1.632402783,1.6592585211,-0.2802312971<br>Ru,0,-0.0750400067,0.8223867482,-1.7103620067<br>N,0,1.1952105204,2.2370536123,-2.699633435<br>N,0,1.2228886288,-4.0667911137,-0.7519231217<br>Ru,0,-1.3994093453,-0.6509215307,0.2913361127<br>O,0,-1.1960832295,-2.4282816846,-0.0132401711<br>O,0,0.7406746571,-3.3147273572,2.1053878587<br>H,0,1.0758130347,-4.9635625533,-0.2988801447<br>H,0,2.2053205541,-3.9939919573,-0.9975162975<br>Ti,0,0.5934449515,-2.4930371871,0.6980762062<br>O,0,2.6482940935,1.6795308452,-0.3213800036<br>H,0,1.9822244451,2.2847066585,-2.024692239<br>H,0,0.7762646692,3.1600373968,-2.7519775449<br>H,0,0.6704919994,-4.0433993328,-1.6029842097<br>H,0,1.5624939929,2.0048340114,-3.619728915 | -1738.505162 |
| <b>(Ru<sub>5</sub>O-TiO<sub>3</sub>)<sub>op</sub></b> | O,0,1.9845605949,-1.2170974231,0.2254987954<br>Ru,0,1.4826573617,0.5325809797,-0.0501387147<br>Ru,0,-0.0773127908,1.1025854715,1.4827373707<br>Ru,0,-1.6360262488,1.5964941216,-0.1588899819<br>Ru,0,-0.1387891221,0.6447799288,-1.6465087399<br>Ru,0,-1.4579087765,-0.6808343196,0.2441278426<br>O,0,-1.1076169291,-2.4393517337,-0.1919329977<br>O,0,0.6244670796,-3.1535791561,2.1744653843<br>Ti,0,0.5313343955,-2.335234386,0.7694136301<br>O,0,2.6726224355,1.713743517,-0.2532375889                                                                                                                                                                                                                                                                                                                                                                                           | -1625.307222 |
| <b>I13</b>                                            | O,0,-0.5143543569,2.3447889673,-0.1400007602<br>O,0,1.4992809898,1.3814555613,1.9933059052<br>Ru,0,1.779988143,0.3663700021,0.3052679119<br>Ru,0,-1.3577210406,-0.597053252,1.1675432543<br>O,0,-1.6295932551,0.7530801207,2.4472920451<br>Ru,0,0.343021883,1.1884114202,-1.3726951122<br>Ru,0,-0.9334039611,-0.7019416219,-1.1532453341<br>Ru,0,0.698951778,-1.5562233523,0.4638166089<br>O,0,0.9358959254,1.5367818149,-2.9072610323<br>Ti,0,-0.2311304803,1.5637433439,1.5148538952<br>H,0,3.4953475796,0.9259849002,-0.2742844923                                                                                                                                                                                                                                                                                                                                                 | -1626.527505 |

|            |                                                                                                                                                                                                                                                                                                                                                                                                                                                                                                                                                                                       |              |
|------------|---------------------------------------------------------------------------------------------------------------------------------------------------------------------------------------------------------------------------------------------------------------------------------------------------------------------------------------------------------------------------------------------------------------------------------------------------------------------------------------------------------------------------------------------------------------------------------------|--------------|
|            | H,0,3.539355795,1.0939980957,0.5071381105                                                                                                                                                                                                                                                                                                                                                                                                                                                                                                                                             |              |
| <b>T13</b> | O,0,-0.9444788789,2.0134614969,-0.4599915111<br>O,0,1.2627435802,1.104154676,1.5292029332<br>Ru,0,1.2280857317,-0.0948708686,-0.1347159043<br>Ru,0,-1.8587378433,-0.9130559303,0.8431197417<br>O,0,-1.9719734229,0.4746260525,2.1196138042<br>Ru,0,-0.1956453581,0.8082617436,-1.7462694079<br>Ru,0,-1.5547293442,-1.02694621,-1.5066104043<br>Ru,0,0.0892837826,-1.9952578415,0.0071367048<br>O,0,0.3400317071,1.106335148,-3.3131223877<br>Ti,0,-0.588721411,1.1896727872,1.1291381413<br>H,0,2.8531523121,0.6781825904,0.0036083831<br>H,0,2.3289471448,1.0472433559,0.8253439068  | -1626.501044 |
| <b>I14</b> | O,0,-0.5112252101,2.3587092579,-0.1078344632<br>O,0,1.7942564639,1.3459508071,1.9403621139<br>Ru,0,1.6657274443,0.2180333207,0.1813933611<br>Ru,0,-1.4027343749,-0.5702076584,1.1696685152<br>O,0,-1.5288785114,0.8550699082,2.414940322<br>Ru,0,0.2610283116,1.1407981532,-1.4071699021<br>Ru,0,-1.1280475403,-0.6840641026,-1.1549916601<br>Ru,0,0.540595989,-1.7010428132,0.3468392057<br>O,0,0.7928282452,1.3926099602,-2.984135981<br>Ti,0,-0.1255795232,1.5283429769,1.4474326692<br>H,0,3.1773492301,0.6829978798,-0.2201313441<br>H,0,2.5803324759,1.8742763101,2.1018691634  | -1626.533726 |
| <b>T14</b> | O,0,-1.2181364031,2.205433118,-0.5167155036<br>O,0,1.1179778351,1.3728658761,1.6636981754<br>Ru,0,1.3103076486,-0.04011953,0.0914529373<br>Ru,0,-1.8069888159,-1.0264206574,0.8030595497<br>O,0,-2.0995596344,0.4695379677,1.9067065617<br>Ru,0,-0.2920487094,0.8657042279,-1.5966011101<br>Ru,0,-1.3761627896,-1.1048074111,-1.5746635464<br>Ru,0,0.2484601334,-1.9701970296,0.022839518<br>O,0,1.1439415581,0.9338656331,-2.6355669296<br>Ti,0,-0.7415328519,1.2285035426,0.9247135564<br>H,0,1.7898779788,0.1946416408,-1.514370954<br>H,0,1.4986010503,1.3098946219,2.5441087451  | -1626.502175 |
| <b>I15</b> | O,0,-0.7240709672,2.4477123131,-0.1087928164<br>O,0,1.5072186542,1.5590992766,2.1224009141<br>Ru,0,1.6526765908,0.217610688,0.5054957314<br>Ru,0,-1.5095750732,-0.7188254353,1.0232717564<br>O,0,-1.7730873141,0.6886818032,2.2568795057<br>Ru,0,0.236709638,1.2291564185,-1.2784895349<br>Ru,0,-0.9293579889,-0.6614160352,-1.3305528503<br>Ru,0,0.5511678871,-1.6916754944,0.3139590841<br>O,0,1.6498487617,1.3801113898,-2.5219737849<br>Ti,0,-0.3578212902,1.4291720508,1.3390640146<br>H,0,2.5206369304,1.0702262542,-2.2371292382<br>H,0,2.0788171714,2.3325167709,2.1861642185 | -1626.539545 |
| <b>I16</b> | O,0,0.0918658379,2.3183161375,0.1829325973<br>O,0,1.3887021676,2.0687446871,2.9559921268<br>Ru,0,1.7558090576,-0.3010425662,0.1220883459<br>Ru,0,-1.470565645,-0.5681551223,1.1406849909<br>O,0,-1.2843630737,0.7609288121,2.4261321608<br>Ru,0,0.4674813241,1.1076774282,-1.2710053858<br>Ru,0,-1.2183158805,-0.3871023165,-1.1817807256                                                                                                                                                                                                                                             | -1627.733921 |

|            |                                                                                                                                                                                                                                                                                                                                                                                                                                                                                                                                                                                                                                                                                               |              |
|------------|-----------------------------------------------------------------------------------------------------------------------------------------------------------------------------------------------------------------------------------------------------------------------------------------------------------------------------------------------------------------------------------------------------------------------------------------------------------------------------------------------------------------------------------------------------------------------------------------------------------------------------------------------------------------------------------------------|--------------|
|            | Ru,0,0.2018604293,-1.8699694387,0.2170170026<br>O,0,1.2581606342,1.3237743219,-2.9741822586<br>Ti,0,0.3144364976,1.3440017465,1.6695440831<br>H,0,2.161455987,1.0071463233,-3.0890130076<br>H,0,1.9927461582,2.8115377862,3.0186608578<br>H,0,3.2992384952,-0.6938011612,0.7673359389<br>H,0,2.7652580105,-0.3135656381,1.4721252736                                                                                                                                                                                                                                                                                                                                                          |              |
| <b>T15</b> | O,0,-0.5515022877,1.9172712291,-0.3869452469<br>O,0,1.1569035689,1.2182965955,2.2699749705<br>Ru,0,1.2210466758,-0.6056643327,-0.2413596611<br>Ru,0,-2.0900943308,-0.9527369504,0.6871097149<br>O,0,-1.9919236297,0.46373845,1.9331366477<br>Ru,0,0.0383937921,0.6407042521,-1.7141674112<br>Ru,0,-1.6707627991,-0.9404850312,-1.6302617262<br>Ru,0,-0.3165496683,-2.2558848735,-0.1309740045<br>O,0,0.4389305363,0.7738919376,-3.5627662<br>Ti,0,-0.4340165214,0.9182584838,1.0955650025<br>H,0,1.3859792395,0.8542767173,-3.7398593358<br>H,0,1.621955927,2.0338979414,2.4844465928<br>H,0,2.4361865541,-0.2458598005,1.0154207166<br>H,0,1.8650879432,0.3856733815,1.5441919407            | -1627.702763 |
| <b>I17</b> | O,0,-0.3082550956,2.5226398628,0.1805366481<br>O,0,1.7826740427,1.9089910856,2.6867105815<br>Ru,0,1.7784898379,-0.1285045031,0.1415994153<br>Ru,0,-1.4331952373,-0.663537517,1.1718389719<br>O,0,-1.2710083705,0.7269861744,2.4492330113<br>Ru,0,0.229708006,1.2887471142,-1.244224464<br>Ru,0,-1.2790285322,-0.3665499483,-1.167156559<br>Ru,0,0.3314335003,-1.7779877225,0.1682196128<br>O,0,1.4109150867,1.2627189989,-2.719248887<br>Ti,0,0.1293313878,1.3178232524,1.4243126242<br>H,0,2.244325812,0.7809495824,-2.6325149712<br>H,0,2.1718926417,2.7920894111,2.6988100688<br>H,0,3.0308444125,0.0745232739,1.2519384656<br>H,0,2.443375508,1.2722289351,2.3056664816                   | -1627.705353 |
| <b>T16</b> | O,0,-0.083190664,1.1734958853,-2.4189253417<br>Ti,0,0.5553576169,-0.4816222012,-2.1944170649<br>O,0,-0.3921365232,-1.5983444628,-3.8107606643<br>Ru,0,-0.8017062702,-1.301956388,-0.4294478759<br>Ru,0,-1.0570634669,1.1574532753,-0.7093571957<br>O,0,-2.8914029811,1.4116140464,-0.3447827671<br>Ru,0,0.2470163808,1.3765920336,1.031552458<br>Ru,0,1.8126011527,-0.4122384352,0.1247554447<br>O,0,2.287726367,-0.7300189661,-1.6840759448<br>Ru,0,0.1788029876,-0.871918173,1.7244991332<br>H,0,-3.394084548,0.5872207546,-0.2849124596<br>H,0,-1.0758287152,-2.1483917004,-3.3935262096<br>H,0,-2.2491830654,-1.8133778682,-1.0847371686<br>H,0,-0.8317542709,-1.0614968003,-4.4851783437 | -1627.686117 |
| <b>I18</b> | O,0,-0.5936955802,0.8708656318,-2.5732328313<br>Ti,0,0.0406506341,-0.7483246787,-2.1098089318<br>O,0,0.0325127953,-1.8178600772,-4.0287449232<br>Ru,0,-1.3422511287,-1.3991227593,-0.0795540136<br>Ru,0,-1.3471501731,1.0405272777,-0.7906099278<br>O,0,-3.063440424,1.4440441031,-0.1232205565<br>Ru,0,0.2929944094,1.3572864029,0.6624220696<br>Ru,0,1.6469909526,-0.5214066338,-0.3192691446                                                                                                                                                                                                                                                                                               | -1627.691890 |

|            |                                                                                                                                                                                                                                                                                                                                                                                                                                                                                                                                                                                                                                                                                               |              |
|------------|-----------------------------------------------------------------------------------------------------------------------------------------------------------------------------------------------------------------------------------------------------------------------------------------------------------------------------------------------------------------------------------------------------------------------------------------------------------------------------------------------------------------------------------------------------------------------------------------------------------------------------------------------------------------------------------------------|--------------|
|            | O,0,1.8501974915,-1.183889782,-2.066056339<br>Ru,0,0.1265128193,-0.8039587027,1.5512111105<br>H,0,-3.5597722976,0.6609009955,0.1580330939<br>H,0,0.9609617821,-2.0570654226,-4.1678964399<br>H,0,-2.9261175367,-1.1950571933,0.1201575059<br>H,0,-0.2894409841,-1.3746894714,-4.8234870122                                                                                                                                                                                                                                                                                                                                                                                                    |              |
| <b>T17</b> | O,0,-0.5831724527,0.8386350455,-2.5158662196<br>Ti,0,0.0594873425,-0.779268335,-2.0733361056<br>O,0,0.0077026305,-1.7884061746,-4.0244358992<br>Ru,0,-1.2826370221,-1.4549782203,-0.0457765437<br>Ru,0,-1.3387854455,0.9910607874,-0.7246202847<br>O,0,-3.135362452,1.4758030516,-0.2462078986<br>Ru,0,0.3354267644,1.3100769962,0.6565090558<br>Ru,0,1.7180119988,-0.5469236549,-0.3171451482<br>O,0,1.8747263779,-1.2087359579,-2.0662983548<br>Ru,0,0.2336499661,-0.8534310123,1.5580198311<br>H,0,-3.3583187027,1.7264570137,0.6563627177<br>H,0,0.9302359856,-2.0187009972,-4.2081332547<br>H,0,-2.8133795952,-1.0950551772,0.1776186703<br>H,0,-0.3424323957,-1.309523365,-4.7860065657 | -1627.677795 |
| <b>I19</b> | O,0,-0.6237185359,0.8675777748,-2.4325842977<br>Ti,0,0.0511572262,-0.7642123526,-2.0563497602<br>O,0,-0.0124383173,-1.7362919904,-4.0250066904<br>Ru,0,-1.2555852451,-1.5087699629,-0.0160139289<br>Ru,0,-1.3588761169,0.9467008068,-0.6435151335<br>O,0,-3.1570162875,1.265539536,-0.077919739<br>Ru,0,0.3583026796,1.2555634864,0.7223647357<br>Ru,0,1.727721447,-0.5667920813,-0.3281425157<br>O,0,1.861911213,-1.1935701858,-2.0963393518<br>Ru,0,0.2720361695,-0.9261499497,1.5708454867<br>H,0,-3.2919591198,2.2066263103,0.1114911803<br>H,0,0.9142850362,-1.9480139921,-4.211425459<br>H,0,-2.7917879718,-1.2119178689,0.2514753671<br>H,0,-0.374632007,-1.2597745107,-4.7821037537   | -1627.682617 |
| <b>T18</b> | O,0,-0.3831948629,0.9088338676,-2.7879907019<br>Ti,0,0.0038676902,-0.7205715328,-2.0955409949<br>O,0,0.0727467994,-1.8787566748,-3.9780416913<br>Ru,0,-1.7487145823,-1.0810151858,-0.3334893593<br>Ru,0,-1.3617911616,1.2360487455,-1.1438136142<br>O,0,-3.1731501241,1.4680570607,-0.1580847033<br>Ru,0,0.1925349631,1.4580387958,0.4403752997<br>Ru,0,1.5770457855,-0.4904972369,-0.258239745<br>O,0,1.7674036844,-1.3230366821,-1.9369981731<br>Ru,0,-0.2054310451,-0.6693372004,1.3216053576<br>H,0,-3.1303682917,1.9030684595,0.705126723<br>H,0,1.0129174482,-2.1173302129,-3.9801964956<br>H,0,-2.925813439,0.1793728137,-0.0413865646<br>H,0,-0.106497864,-1.3733100171,-4.7807843371 | -1627.657661 |
| <b>I20</b> | O,0,-0.581545896,0.6501102944,-2.9477589745<br>Ti,0,0.0786937217,-0.8233459897,-2.1524932912<br>O,0,0.3347781572,-2.0151699918,-4.0022505612<br>Ru,0,-1.8020530274,-1.1435645552,-0.5190168928<br>Ru,0,-1.5881929515,1.0545757632,-1.3374554211<br>O,0,-3.0290687572,1.840721413,0.3299931816<br>Ru,0,0.0300202894,1.4570182056,0.3038374148<br>Ru,0,1.5668126073,-0.2945840429,-0.309337773<br>O,0,1.9051801702,-1.1503750993,-1.9623799805                                                                                                                                                                                                                                                  | -1627.671484 |

|            |                                                                                                                                                                                                                                                                                                                                                                                                                                                                                                                                                                                                                                                                                            |              |
|------------|--------------------------------------------------------------------------------------------------------------------------------------------------------------------------------------------------------------------------------------------------------------------------------------------------------------------------------------------------------------------------------------------------------------------------------------------------------------------------------------------------------------------------------------------------------------------------------------------------------------------------------------------------------------------------------------------|--------------|
|            | Ru,0,-0.3209368029,-0.7183018004,1.1308153623<br>H,0,-2.6238159663,1.31778224,1.0454493744<br>H,0,1.29776861,-2.1305904352,-3.9770295095<br>H,0,-3.871239694,1.4065447441,0.140085451<br>H,0,0.1177505394,-1.5215777459,-4.8035493801                                                                                                                                                                                                                                                                                                                                                                                                                                                      |              |
| <b>T19</b> | O,0,0.027395716,0.1193997296,0.0441899336<br>Ru,0,0.1351579054,0.0384289998,1.9717154099<br>Ru,0,2.3108735069,0.0701205978,2.7019884529<br>Ru,0,2.2788275138,-2.0892507605,3.3119707159<br>Ru,0,2.6955578374,-1.7970194495,0.9119483505<br>O,0,2.2961163864,-2.0996834743,-0.928680961<br>Ti,0,0.6833490277,-1.5563306969,-0.1178409853<br>Ru,0,0.198587625,-2.333308882,2.3035352053<br>O,0,-0.1092189561,-2.2819922135,-2.0602697823<br>O,0,-0.3935190505,0.309127488,4.2331202569<br>H,0,0.3873489136,-0.1422537878,4.6031925778<br>H,0,0.7618169348,-2.462805498,-2.4536467137<br>H,0,-1.1409286835,-0.2791601177,4.4001100655<br>H,0,-0.601576677,-1.701041935,-2.6522665261          | -1627.645820 |
| <b>I21</b> | O,0,-1.212506949,1.7708263715,-1.6823199187<br>Ru,0,-1.0826704003,1.3588150052,0.1831989617<br>Ru,0,1.0829398257,1.1182805402,0.8894762069<br>Ru,0,0.8528764844,-1.0121635125,1.519539331<br>Ru,0,1.0883293305,-0.6993154859,-0.9654159652<br>O,0,0.8649785882,-0.4196699457,-2.9416738063<br>Ti,0,-0.686413082,0.0942639307,-2.1528462261<br>Ru,0,-1.1319781412,-1.0712196606,0.3429929006<br>O,0,-1.5994869645,-0.9683900863,-3.8662609864<br>O,0,-1.6242571598,1.4262483184,2.4448734143<br>H,0,-0.9371973459,0.7946434038,2.736606373<br>H,0,-0.7314812666,-1.2099470943,-4.2395669712<br>H,0,-2.4693973091,0.9785677705,2.5785054781<br>H,0,-2.1608596102,-0.6242895552,-4.5706337918 | -1627.652956 |
| <b>T20</b> | O,0,0.0750752708,0.3797604244,0.152554246<br>Ru,0,0.4960452644,0.0265794392,2.0913752975<br>Ru,0,2.5506240937,-0.2413058675,3.0190543081<br>Ru,0,2.2833901123,-2.4325155096,3.3830065939<br>Ru,0,2.4469662159,-1.8050006418,0.9557908302<br>O,0,2.2376362723,-1.5899497321,-1.0030458286<br>Ti,0,0.5824091437,-1.2425749041,-0.3417486923<br>Ru,0,0.2821479618,-2.3509749385,2.219940068<br>O,0,-0.1345846566,-2.4091667108,-2.0709342459<br>O,0,-0.3393103616,0.4083807239,4.1907066515<br>H,0,0.2387516717,-0.2174995108,4.6605357778<br>H,0,0.7497767911,-2.6154377514,-2.4209828014<br>H,0,-1.2307998126,0.0380117141,4.2351309183<br>H,0,-0.7083419669,-2.1540767351,-2.8023171231    | -1627.646475 |
| <b>I22</b> | O,0,-1.692095193,2.0943001458,-1.377822189<br>Ru,0,-0.7790039603,0.943266266,0.0564425314<br>Ru,0,1.3212184002,0.5390173764,1.0704738944<br>Ru,0,1.0504601057,-1.6572834562,0.8511200302<br>Ru,0,1.0156833263,-0.210948921,-1.2893443045<br>O,0,0.6889563361,0.8056151137,-3.0118327828<br>Ti,0,-0.9630075117,0.7820061043,-2.3795546106<br>Ru,0,-0.9484758758,-1.379089668,-0.1709987491<br>O,0,-1.9747177147,-0.8388893379,-3.4229467764<br>O,0,-2.3158825296,2.1345216118,1.2768074079                                                                                                                                                                                                  | -1627.676746 |

|            |                                                                                                                                                                                                                                                                                                                                                                                                                                                                                             |              |
|------------|---------------------------------------------------------------------------------------------------------------------------------------------------------------------------------------------------------------------------------------------------------------------------------------------------------------------------------------------------------------------------------------------------------------------------------------------------------------------------------------------|--------------|
|            | H,0,-3.0190186307,1.6147726088,1.6817564091<br>H,0,-1.594073085,-1.501031027,-2.7895638492<br>H,0,-2.6714793029,2.5290930259,0.4595071003<br>H,0,-1.6558963647,-1.0756908428,-4.3056501119                                                                                                                                                                                                                                                                                                  |              |
| <b>T21</b> | O,0,1.8960691486,-1.298984033,-0.1354361374<br>Ru,0,1.4873096162,0.489845286,-0.1088070995<br>Ru,0,-0.0689893398,0.6953495397,1.5146677735<br>Ru,0,-1.6316898765,1.525513072,-0.0026413546<br>Ru,0,-0.1272927404,1.0209582975,-1.6454213411<br>Ru,0,-1.3785135355,-0.7989870624,-0.0500982892<br>O,0,-1.1616259477,-2.6481675209,-0.0734991103<br>O,0,0.6425299607,-2.5614993153,2.381682071<br>Ti,0,0.517283346,-2.3180074074,0.7670266108<br>O,0,2.7029063684,1.6580671437,-0.0519391233  | -1625.305769 |
| <b>I23</b> | O,0,1.9029905023,-1.6038135056,-0.01149024<br>Ru,0,1.7515573124,0.2983752281,-0.3591010642<br>Ru,0,0.204908174,0.3432169109,1.3752112065<br>Ru,0,-1.5961784975,1.3191383294,0.217143457<br>Ru,0,-0.0241803461,0.5551569113,-1.7723536106<br>Ru,0,-1.2118773307,-0.9059636672,-0.3182684755<br>O,0,-1.0124209489,-2.7287855327,0.3346680024<br>O,0,0.3085164996,-1.1529555967,2.5878307596<br>Ti,0,0.5365273149,-2.1743111382,1.0874789647<br>O,0,2.98512932,1.4340360607,-0.3213030001      | -1625.331227 |
| <b>T22</b> | O,0,1.7628936434,-1.4125807534,-0.3128925125<br>Ru,0,1.6059878685,0.5187148382,-0.5794211459<br>Ru,0,0.0897795201,0.8029136172,1.251653652<br>Ru,0,-1.524890682,1.7040206315,0.0356533897<br>Ru,0,-0.2233460569,0.7611384174,-1.8926124526<br>Ru,0,-1.4424141303,-0.6582057511,-0.4102654784<br>O,0,-1.0966701611,-2.4060943426,0.3131627331<br>O,0,0.4944258259,-0.8154486288,2.3075966884<br>Ti,0,0.5397323398,-1.9296098788,0.9196105709<br>O,0,2.2662798327,1.6628188504,0.5626575553   | -1625.296308 |
| <b>I24</b> | O,0,2.0060772284,-1.7461259693,-0.1950513411<br>Ru,0,1.7028796183,0.0985852517,-0.4264419247<br>Ru,0,0.5157852225,0.7281295388,1.5132372361<br>Ru,0,-1.3101603412,1.1631720993,0.2710294078<br>Ru,0,-0.1103250436,0.5253167374,-1.6893822523<br>Ru,0,-1.4803457666,-1.1489227795,-0.5309222147<br>O,0,-1.0159106457,-2.7856404502,0.2859888734<br>O,0,0.3637528444,-0.8702015678,2.4946490501<br>Ti,0,0.4178983299,-1.7823401624,0.8350950558<br>O,0,2.0096435537,1.5844123019,0.7125461095 | -1625.365943 |
| <b>T23</b> | O,0,1.8771204871,-1.8362843254,-0.3439324202<br>Ru,0,1.7804388987,0.0323145359,-0.6108092852<br>Ru,0,0.6610575292,0.8762604379,1.3662354224<br>Ru,0,-1.255200975,1.151346683,0.2254589797<br>Ru,0,-0.158237389,0.193568839,-1.7824129715<br>Ru,0,-1.5081592603,-1.1515730607,-0.5064645857<br>O,0,-1.169213261,-2.7583326258,0.4249893026<br>O,0,0.4752540638,-0.8480480175,2.2755181411<br>Ti,0,0.4244231059,-1.8907674364,0.8089770539<br>O,0,1.9718118005,1.99789997,1.413188363         | -1625.318265 |
| <b>T4E</b> | O,0,1.9865229051,-0.4015355593,1.8134712266<br>Ru,0,1.2014159234,0.6542803126,0.4606374092<br>Ru,0,-0.46235591,2.1035765521,0.2294876419                                                                                                                                                                                                                                                                                                                                                    | -1661.929644 |

|            |                                                                                                                                                                                                                                                                                                                                                                                                                                                                                                                                                                                                                                                                                                                                                                             |              |
|------------|-----------------------------------------------------------------------------------------------------------------------------------------------------------------------------------------------------------------------------------------------------------------------------------------------------------------------------------------------------------------------------------------------------------------------------------------------------------------------------------------------------------------------------------------------------------------------------------------------------------------------------------------------------------------------------------------------------------------------------------------------------------------------------|--------------|
|            | <p>Ru,0,-1.3069744595,0.9152661327,-1.5629277585<br/> Ru,0,0.2450055551,-0.7150919081,-1.4671874135<br/> N,0,1.7971177906,-1.0098150938,-2.405922491<br/> N,0,2.812093985,-1.7191732769,-2.112188305<br/> Ru,0,-1.0691132257,-0.3538329294,0.6851705608<br/> O,0,-0.8737436282,-1.7866460531,1.9670021418<br/> O,0,1.3597816582,-2.9905338348,0.2690179468<br/> H,0,2.8145069003,-2.2907773401,-1.2595330457<br/> H,0,3.5807575322,-1.7834667653,-2.7705193762<br/> Ti,0,0.889045023,-1.8930177172,1.5137890249<br/> H,0,0.4173129867,-2.6456263829,-0.8732084451<br/> H,0,-0.1022890362,-2.4805801365,-1.5667611169</p>                                                                                                                                                    |              |
| <b>I4E</b> | <p>O,0,1.7494828778,-0.6103789605,1.7674875052<br/> Ru,0,1.1923316027,0.738350526,0.5350181961<br/> Ru,0,-0.4019971756,2.2635614177,0.1881576731<br/> Ru,0,-1.2384300126,1.1291988351,-1.6324999455<br/> Ru,0,0.3462670018,-0.5329753361,-1.4237285923<br/> N,0,1.7606577357,-0.8301479336,-2.483319313<br/> N,0,2.9369581969,-1.3189504369,-2.6243403277<br/> Ru,0,-1.1549655889,-0.1278526512,0.5998977334<br/> O,0,-1.0191466544,-1.6719481636,1.8170289478<br/> O,0,1.2556423676,-3.6492672412,1.2987641428<br/> H,0,3.3763607559,-1.875896323,-1.8987745318<br/> H,0,3.4389590145,-1.1674152969,-3.4900975304<br/> Ti,0,0.6175943776,-1.9319904853,1.1834733282<br/> H,0,0.8974022269,-4.5344929999,1.3882296989<br/> H,0,0.2294392741,-2.1110479507,-0.886217985</p>  | -1661.989853 |
| <b>T5E</b> | <p>O,0,1.6790294906,-0.3240486799,2.1040914809<br/> Ru,0,1.1285138436,0.8369234015,0.6332998987<br/> Ru,0,-0.5537767995,2.20002508,0.0207888674<br/> Ru,0,-1.2282739769,0.8129182376,-1.6576108381<br/> Ru,0,0.5152514092,-0.6864356641,-1.2127317216<br/> N,0,1.9523065415,-1.1269861238,-2.1378511062<br/> N,0,3.0913774266,-1.5087546752,-2.590719595<br/> Ru,0,-1.1789824515,-0.1635978663,0.6731011608<br/> O,0,-1.0858043543,-1.5595915045,2.1178172054<br/> O,0,0.9855026024,-3.3038267221,0.4423251706<br/> H,0,3.6732969308,-2.147270986,-2.0613661249<br/> H,0,3.4383832132,-1.1468944986,-3.470251855<br/> Ti,0,0.5670146609,-1.6388028687,1.519993513<br/> H,0,0.337503945,-4.0192217342,0.3901496259<br/> H,0,0.6652125184,-2.4556893956,-0.431955682</p>      | -1661.941997 |
| <b>I5E</b> | <p>O,0,1.4252603051,-1.1224528689,2.4527511534<br/> Ru,0,1.2845431944,0.2590810302,1.0458291583<br/> Ru,0,-0.0851497742,1.9723570357,0.4868366623<br/> Ru,0,-0.7863622061,0.9231352488,-1.3764787173<br/> Ru,0,0.6041716502,-0.9189859959,-0.9734716044<br/> N,0,1.9154593378,-1.585175013,-1.9442619197<br/> N,0,2.8023116589,-1.7251347564,-2.8987454135<br/> Ru,0,-1.1802833116,-0.2920469051,0.8162093286<br/> O,0,-1.4533948299,-1.8723375664,2.0418947114<br/> O,0,0.9950643078,-3.9114561665,0.5848424197<br/> H,0,3.5168537166,-2.4334215274,-2.7814487052<br/> H,0,3.0868350237,-0.8897148866,-3.3981441757<br/> Ti,0,0.2206702064,-2.1219336412,1.5682834063<br/> H,0,1.8020795398,-4.3660363345,0.8599514227<br/> H,0,1.137143181,-3.5651416529,-0.322416727</p> | -1661.945628 |

|            |                                                                                                                                                                                                                                                                                                                                                                                                                                                                                                                                                                                                                                                                                                                                          |              |
|------------|------------------------------------------------------------------------------------------------------------------------------------------------------------------------------------------------------------------------------------------------------------------------------------------------------------------------------------------------------------------------------------------------------------------------------------------------------------------------------------------------------------------------------------------------------------------------------------------------------------------------------------------------------------------------------------------------------------------------------------------|--------------|
| <b>T6E</b> | O,0,1.0115133683,-0.7476831396,2.7338541003<br>Ru,0,1.0144698359,0.6351861847,1.2944021706<br>Ru,0,-0.4654636985,2.2212570308,0.4915303783<br>Ru,0,-0.5745279985,1.2463547996,-1.467680332<br>Ru,0,0.9247095917,-0.5044988618,-0.7576272826<br>N,0,2.0927420777,-1.3596151423,-1.7490042872<br>N,0,2.6673251516,-1.9724817142,-2.7862909755<br>Ru,0,-1.2750391528,-0.1753947598,0.5176945116<br>O,0,-1.6034840744,-1.8148130591,1.6449804169<br>O,0,1.1890519827,-3.6240213268,0.8833772601<br>H,0,3.55276392,-1.5620950143,-3.0678155609<br>H,0,2.0523564239,-2.1559419081,-3.5743632793<br>Ti,0,0.1616082809,-1.8325481374,1.594897681<br>H,0,2.1225276562,-3.4004564952,0.7380690358<br>H,0,0.8500536352,-3.8017014565,-0.008999837   | -1661.941801 |
| <b>I6E</b> | O,0,1.3156392665,-0.7649712876,2.430413126<br>Ru,0,1.0123329082,0.7138791853,1.226748903<br>Ru,0,-0.7493733085,2.1015415335,0.680977387<br>Ru,0,-0.9258113168,1.2440884531,-1.3593228429<br>Ru,0,0.8280355386,-0.3413586159,-0.9242758081<br>N,0,2.0192900192,-1.3670383563,-1.7332028776<br>N,0,2.3761493021,-2.7037561581,-1.9936737454<br>Ru,0,-1.1719303498,-0.3875426462,0.5655599498<br>O,0,-1.0885320042,-2.1967746573,1.4735118182<br>O,0,1.6832696155,-3.5426437016,0.3615426075<br>H,0,3.3559244651,-2.7427816743,-2.2745244874<br>H,0,1.8201748457,-3.0739137666,-2.7656161293<br>Ti,0,0.6303537238,-1.9534317434,1.2292854245<br>H,0,2.0237688882,-3.3457879522,-0.6199153611<br>H,0,1.4619394066,-4.4759506124,0.4441810358 | -1661.950217 |
| <b>T7E</b> | O,0,1.3350647993,-0.7750280787,2.4058983761<br>Ru,0,1.0142180168,0.7124648444,1.22686802<br>Ru,0,-0.7498110215,2.0971410575,0.7008607524<br>Ru,0,-0.934416015,1.2465340772,-1.3504037398<br>Ru,0,0.8163583672,-0.3270348624,-0.9349189379<br>N,0,2.0086555499,-1.3537847153,-1.757407457<br>N,0,2.3603047683,-2.7154510528,-1.9420905336<br>Ru,0,-1.1689180146,-0.3923339505,0.5691509712<br>O,0,-1.0782030802,-2.2008509208,1.4669446536<br>O,0,1.6729998647,-3.5209880218,0.3367566296<br>H,0,3.3501739264,-2.7763606652,-2.1830006615<br>H,0,1.8315664104,-3.1127910886,-2.7202881333<br>Ti,0,0.641948483,-1.9695461897,1.2095280011<br>H,0,2.0321992521,-3.2937066042,-0.71586072<br>H,0,1.4590896934,-4.4547058291,0.4296517792     | -1661.952104 |
| <b>I7E</b> | O,0,1.19076612,-0.9559236994,2.2822235697<br>Ru,0,0.8529849858,0.5750744587,1.1930290764<br>Ru,0,-0.9382784772,1.8914204088,0.6313797875<br>Ru,0,-0.9032170507,1.171864805,-1.5000012609<br>Ru,0,0.8741305744,-0.2941772517,-1.0493214379<br>N,0,2.1723606892,-1.1918283089,-1.9257661468<br>N,0,2.5191835218,-2.5873728089,-2.0996583412<br>Ru,0,-1.2061110579,-0.595849853,0.2886657955<br>O,0,-1.0934899939,-2.4197783977,1.1108944315<br>O,0,1.7262681515,-3.5881033225,0.2748906546<br>H,0,3.5194273291,-2.6664741873,-2.2969713554<br>H,0,2.0109365475,-2.9917695184,-2.8903919638                                                                                                                                                 | -1661.954529 |



|                                                                   |                                                                                                                                                                                                                                                                                                                                                                                                                                                                                                                                                                                                                                                                                       |              |
|-------------------------------------------------------------------|---------------------------------------------------------------------------------------------------------------------------------------------------------------------------------------------------------------------------------------------------------------------------------------------------------------------------------------------------------------------------------------------------------------------------------------------------------------------------------------------------------------------------------------------------------------------------------------------------------------------------------------------------------------------------------------|--------------|
|                                                                   | Ti,0,0.6441664419,-2.1517764481,0.9964965723<br>H,0,2.2830787137,-3.1316073324,-1.2140378999<br>H,0,1.5151705047,-4.5221855442,0.3641865183                                                                                                                                                                                                                                                                                                                                                                                                                                                                                                                                           |              |
| <b>I8E</b>                                                        | O,0,1.415241636,-0.7799811637,2.448481322<br>Ru,0,1.0558120251,0.5055680642,1.1022228694<br>Ru,0,-0.8256299087,1.7937868916,0.7211263069<br>Ru,0,-0.9014177429,1.3080848899,-1.4357791938<br>Ru,0,0.9420284561,-0.1439030681,-1.219496758<br>N,0,2.2727590589,-0.1793289662,-2.1287926648<br>Ru,0,-1.126419511,-0.623808594,0.4397889376<br>O,0,-1.1998668388,-2.1755570231,1.6315380797<br>O,0,1.5027630064,-3.6504392094,1.1044534393<br>Ti,0,0.5746160133,-2.1523134339,1.5725867491<br>H,0,1.3449248056,-4.5023073875,0.6919669125                                                                                                                                                | -1605.437122 |
| <b><sup>5</sup>(Ru<sub>6</sub>-TiO<sub>2</sub>)</b>               | Ru,0,-1.1080956169,0.58307076,-0.6647317959<br>Ru,0,-1.2512023812,0.6696550193,1.6318176546<br>Ru,0,1.2194365939,0.7117564362,1.785806183<br>Ru,0,0.0433809842,-1.372876027,1.7965390465<br>Ru,0,0.1526516265,-1.4663661271,-0.4860528528<br>Ru,0,1.3492101836,0.67041017,-0.5049075397<br>Ti,0,0.56831921,-0.2181416664,-2.7934012316<br>O,0,0.5916296802,-1.9249999743,-2.4468603374<br>O,0,2.0625797197,0.6133724092,-2.4015321267                                                                                                                                                                                                                                                 | -1569.700039 |
| <b><sup>5</sup>(Ru<sub>6</sub>-TiO<sub>2</sub>-N<sub>2</sub>)</b> | Ru,0,-1.35424021,0.6581595782,-0.1057120507<br>Ru,0,-0.9770909472,0.2614120119,2.121372989<br>Ru,0,1.3938372182,0.5366234308,1.7717101551<br>Ru,0,0.5362187286,-1.7176383968,1.5662052626<br>Ru,0,0.1652670755,-1.3885959853,-0.6650197218<br>Ru,0,1.0396266883,0.8825448163,-0.444531895<br>Ti,0,-0.3467847143,0.2071362057,-2.6707594387<br>O,0,-0.0493303155,-1.5165805035,-2.7123902298<br>O,0,1.0745291249,1.221438744,-2.4729921746<br>N,0,-2.1138989803,1.2344332397,-2.1114809208<br>N,0,-2.3997046682,1.9772058591,-1.2478829753                                                                                                                                             | -1679.292114 |
| <b><sup>5</sup>I<sub>1</sub></b>                                  | Ru,0,-1.3469498009,0.6540633745,-0.1129496179<br>Ru,0,-0.9848464071,0.2495439281,2.1168701413<br>Ru,0,1.379431718,0.5421911231,1.790478411<br>Ru,0,0.5386574415,-1.7212640967,1.5749631931<br>Ru,0,0.1892242296,-1.3879990455,-0.6562387742<br>Ru,0,1.0327095616,0.8793157485,-0.435470851<br>Ti,0,-0.3656772184,0.2024720212,-2.731501189<br>O,0,-0.031514654,-1.533297656,-2.6951062224<br>O,0,1.0405934984,1.219788932,-2.4927567133<br>N,0,-2.1034993203,1.2564161044,-2.1017435568<br>N,0,-2.3797000421,1.9949088559,-1.2280243752<br>O,0,-0.4863790464,0.133619719,-4.9198877204<br>H,0,-0.1959351141,-0.7628829006,-5.1445113812<br>H,0,0.0810381541,0.753859892,-5.3960073442 | -1755.769345 |
| <b><sup>5</sup>T<sub>1</sub></b>                                  | Ru,0,0.0769681758,0.1313795132,0.0301480023<br>Ru,0,0.0108853219,-0.0659600816,2.3551378731<br>Ru,0,2.3672997627,-0.0185618644,2.4169325867                                                                                                                                                                                                                                                                                                                                                                                                                                                                                                                                           | -1755.747057 |

|                             |                                                                                                                                                                                                                                                                                                                                                                                                                                                                                                                                                                                                                                                                                                                          |              |
|-----------------------------|--------------------------------------------------------------------------------------------------------------------------------------------------------------------------------------------------------------------------------------------------------------------------------------------------------------------------------------------------------------------------------------------------------------------------------------------------------------------------------------------------------------------------------------------------------------------------------------------------------------------------------------------------------------------------------------------------------------------------|--------------|
|                             | <p>Ru,0,1.3255463189,-2.1845586033,2.2391045361<br/> Ru,0,1.3661716173,-2.1257835305,-0.0401026775<br/> Ru,0,2.4280152484,0.1441610191,0.1139189489<br/> Ti,0,1.9922279379,-1.0000436725,-2.2474879<br/> O,0,2.0729678449,-2.7250509744,-1.755678725<br/> O,0,3.2926402676,0.0520022849,-1.7286580588<br/> N,0,-0.8637529825,0.1290449071,-1.7993718867<br/> N,0,-0.930206547,1.2159390223,-1.2918190842<br/> O,0,0.6450918936,-0.4891754637,-3.6186596032<br/> H,0,-0.4382632429,-0.1450739853,-2.8569932037<br/> H,0,0.7398363835,0.0873494288,-4.3828828081</p>                                                                                                                                                       |              |
| <sup>5</sup> I <sub>2</sub> | <p>Ru,0,-1.3792641579,0.916411473,-0.5179994844<br/> Ru,0,-1.1788431184,0.6372573486,1.7816436964<br/> Ru,0,1.168441409,0.6188340984,1.5553172215<br/> Ru,0,0.0675007832,-1.4935055708,1.3836623504<br/> Ru,0,-0.1159787299,-1.3616753531,-0.853801415<br/> Ru,0,0.9393701215,0.8991564871,-0.7148268142<br/> Ti,0,1.2898764112,-0.5240972267,-3.135368309<br/> O,0,0.8502521041,-2.0799997357,-2.3659367744<br/> O,0,2.0883819624,0.8275852946,-2.3436063205<br/> N,0,-2.9033547429,0.9768568334,-1.9094566211<br/> N,0,-2.6844444551,2.0727101283,-1.4055641541<br/> O,0,0.5958512871,-0.233677186,-4.8044208706<br/> H,0,-3.4939154204,0.884725491,-2.7457714705<br/> H,0,0.6200355463,0.5542079178,-5.3551420343</p> | -1755.758158 |
| <sup>5</sup> T <sub>2</sub> | <p>O,0,0.0414050016,-0.0237073257,-0.0659524344<br/> Ti,0,-0.0407793632,-0.129331924,1.7085692697<br/> O,0,1.5543892805,-0.2329518006,2.5940092642<br/> Ru,0,-0.8509870963,1.6987881411,-0.2411858039<br/> Ru,0,-2.1742758452,1.7087346407,1.9351557666<br/> O,0,-1.5301053151,-0.0029190347,2.6609247418<br/> Ru,0,-0.983435641,3.6189934061,1.3555959737<br/> N,0,-0.1664284771,5.0385526661,2.3401266668<br/> N,0,0.9089675405,5.2071682476,1.7837845308<br/> Ru,0,-2.8505425388,4.4413089955,0.1970924343<br/> Ru,0,-2.7291314044,2.5034696848,-1.2721338772<br/> Ru,0,-3.9969771522,2.4497822664,0.7444780179<br/> H,0,1.5454265331,5.8399173039,2.3019559008<br/> H,0,1.7727537339,-0.2250546575,3.5300529406</p>  | -1755.753776 |
| <sup>5</sup> I <sub>3</sub> | <p>O,0,1.7905741148,-2.615211375,-0.4163125902<br/> Ti,0,2.0626881372,-1.9031448014,1.1768874426<br/> O,0,3.7356329735,-2.035762508,1.8926452446<br/> Ru,0,0.5473532728,-1.2049123196,-1.0474963486<br/> Ru,0,-0.4231263042,-0.609797618,1.2048928334<br/> O,0,0.5862314184,-1.9571191278,2.1978081877<br/> Ru,0,1.1147205891,0.8886967578,0.1217434918<br/> N,0,2.0541316966,1.8554201866,1.3198318662<br/> N,0,2.9017223629,2.2390108596,2.0958812664<br/> Ru,0,-0.738326963,1.9071908215,-0.9195442255<br/> Ru,0,-1.1922420145,-0.1597704137,-2.0861325482</p>                                                                                                                                                        | -1755.763846 |

|                                |                                                                                                                                                                                                                                                                                                                                                                                                                                                                                                                                                                                                                                                                                                                                                                                                                                      |              |
|--------------------------------|--------------------------------------------------------------------------------------------------------------------------------------------------------------------------------------------------------------------------------------------------------------------------------------------------------------------------------------------------------------------------------------------------------------------------------------------------------------------------------------------------------------------------------------------------------------------------------------------------------------------------------------------------------------------------------------------------------------------------------------------------------------------------------------------------------------------------------------|--------------|
|                                | Ru,0,-2.1855969571,0.4252965448,0.1844605675<br>H,0,2.7053730912,3.1948070511,2.4437623209<br>H,0,4.1518015822,-1.955907058,2.7537524916                                                                                                                                                                                                                                                                                                                                                                                                                                                                                                                                                                                                                                                                                             |              |
| <sup>5</sup> T <sub>3</sub>    | O,0,0.3679558561,0.1094406729,0.3387079613<br>Ti,0,-0.1833384999,-0.1074229145,2.0531246894<br>O,0,1.0141467123,-0.6962106465,3.1437248034<br>Ru,0,0.8357766545,1.9943764893,0.4692749148<br>Ru,0,-0.4028342275,2.6957153148,2.4148183882<br>O,0,-1.3431790554,1.0634814879,2.8347258961<br>Ru,0,2.074657407,2.7276264765,2.4291681702<br>N,0,2.5119462134,1.9310762085,4.0056557884<br>N,0,2.4330979101,0.7897832761,4.5053623738<br>Ru,0,2.0095045561,5.0276681126,1.9589548601<br>Ru,0,0.8455138551,4.1689481394,-0.2670223006<br>Ru,0,-0.3693874068,4.8493037033,1.6789235896<br>H,0,2.8091020461,0.7114281338,5.4548976738<br>H,0,1.7517306443,-0.0930203144,3.8849629533                                                                                                                                                       | -1755.760706 |
| <sup>5</sup> I <sub>4</sub>    | O,0,-0.3452417719,-2.8854252714,-1.3331421481<br>Ti,0,-1.0288710169,-3.1703432361,0.3642668204<br>O,0,0.038141573,-3.9138655073,1.3981722314<br>Ru,0,0.1059491331,-1.0395296846,-1.1343534421<br>Ru,0,-1.1493679167,-0.3554970924,0.803373254<br>O,0,-2.1038042323,-1.9280370464,1.2522224223<br>Ru,0,1.333444895,-0.2785844355,0.8024071806<br>N,0,1.7624020236,-1.0937146427,2.3627013968<br>N,0,1.6573636076,-2.2407190101,2.8938498465<br>Ru,0,1.2084658256,2.002817072,0.2781413469<br>Ru,0,0.0162637869,1.1153895534,-1.9217914463<br>Ru,0,-1.1793330729,1.7830795037,0.0272672093<br>H,0,1.9535995897,-2.3472924643,3.8596396241<br>H,0,1.1510155763,-3.0181127381,2.4136447044                                                                                                                                               | -1755.761449 |
| <sup>5</sup> I <sub>4</sub> WT | O,0,-0.3605199948,-2.9463256552,-1.2094581522<br>Ru,0,0.1593824754,-1.1225276591,-1.083417684<br>Ru,0,0.0684584361,0.9677669314,-2.0094881799<br>Ru,0,-1.1313961967,1.7841571315,-0.1247879588<br>Ru,0,1.261745272,1.9761227402,0.137162852<br>Ru,0,1.3312029308,-0.2632663017,0.8301523045<br>N,0,1.8022010212,-1.0454384786,2.4005716878<br>N,0,1.6981409823,-2.1869258095,2.95537919<br>Ti,0,-1.0646695464,-3.1505678921,0.4905524092<br>O,0,-2.1727961456,-1.8950642205,1.2582065765<br>Ru,0,-1.1520494268,-0.2722029163,0.8223138773<br>O,0,-2.1711295799,0.1702946632,2.8775399554<br>O,0,-0.026321569,-3.8493288504,1.5928710669<br>H,0,2.0401816055,-2.2866112755,3.9062695836<br>H,0,1.1615220842,-2.9643992807,2.5073907136<br>H,0,-1.4850367741,0.1977176749,3.5551264167<br>H,0,-2.5028725744,-0.7497868017,2.8446293415 | -1832.219023 |
| <sup>5</sup> T <sub>4</sub>    | O,0,-0.3506659061,-2.8584882546,-1.175378921<br>Ru,0,0.2337196254,-1.0815042816,-0.980293477                                                                                                                                                                                                                                                                                                                                                                                                                                                                                                                                                                                                                                                                                                                                         | -1832.189475 |

|                             |                                                                                                                                                                                                                                                                                                                                                                                                                                                                                                                                                                                                                                                                                                                                                                                                                                                                               |              |
|-----------------------------|-------------------------------------------------------------------------------------------------------------------------------------------------------------------------------------------------------------------------------------------------------------------------------------------------------------------------------------------------------------------------------------------------------------------------------------------------------------------------------------------------------------------------------------------------------------------------------------------------------------------------------------------------------------------------------------------------------------------------------------------------------------------------------------------------------------------------------------------------------------------------------|--------------|
|                             | <p>Ru,0,0.0897174859,0.9757228219,-1.9843930174<br/> Ru,0,-1.025409885,1.8379052974,-0.0412598588<br/> Ru,0,1.3490672878,2.0876223404,0.0747142713<br/> Ru,0,1.5269293254,-0.1393404879,0.8156881066<br/> N,0,1.7818894905,-0.7587625555,2.4565221845<br/> N,0,0.9387562704,-1.605252848,3.2236957233<br/> Ti,0,-1.215605263,-3.0784653113,0.4705094849<br/> O,0,-2.2687379893,-1.7409191383,1.0187754216<br/> Ru,0,-1.0089747664,-0.1646357152,0.9450937758<br/> O,0,-1.2248571046,-0.2913288015,2.9583385394<br/> O,0,-0.2122994291,-3.5691073663,1.7245775658<br/> H,0,1.3581530352,-1.7840155765,4.1348288002<br/> H,0,0.6789023751,-2.5025111647,2.7236314902<br/> H,0,-0.0467938996,-1.0414825856,3.2999989692<br/> H,0,-2.0027276525,-0.8587433729,3.0707629412</p>                                                                                                    |              |
| <sup>5</sup> I <sub>5</sub> | <p>O,0,-0.411290096,-2.9250432326,-1.2637005614<br/> Ru,0,0.1819560546,-1.1514501376,-1.0649634758<br/> Ru,0,0.0393551842,0.907945009,-2.062811549<br/> Ru,0,-1.0719211107,1.7744675245,-0.1162528525<br/> Ru,0,1.3004234894,2.0187327657,-0.0063229651<br/> Ru,0,1.4770099968,-0.210279612,0.7307377205<br/> N,0,1.7422313574,-0.8416609206,2.3660741596<br/> N,0,0.8968556701,-1.6992339119,3.1293640253<br/> Ti,0,-1.2677334157,-3.1415344204,0.3861359338<br/> O,0,-2.3203911642,-1.807125871,0.9341789948<br/> Ru,0,-1.0596697869,-0.228994887,0.8677078144<br/> O,0,-1.2867939212,-0.3365440435,2.8657035934<br/> O,0,-0.2549586389,-3.6282766072,1.6379834256<br/> H,0,1.3284755092,-1.901884442,4.0299739865<br/> H,0,0.6176528658,-2.5883127195,2.6120067687<br/> H,0,-0.0516080878,-1.1442234493,3.2383335627<br/> H,0,-2.0767669061,-0.8854100447,2.9843204184</p> | -1832.188223 |
| <sup>5</sup> T <sub>5</sub> | <p>O,0,-0.3510544049,-3.0171842896,-1.3324552476<br/> Ru,0,0.286320177,-1.2364343694,-1.0805956788<br/> Ru,0,0.3325782624,0.9265087013,-1.9244364386<br/> Ru,0,-1.3018837212,1.6581183906,-0.1570018568<br/> Ru,0,1.0084738882,2.2837784718,-0.036507634<br/> Ru,0,1.4361008785,0.007966021,0.7343876751<br/> N,0,1.9922727717,-0.8053328072,2.0764853478<br/> N,0,0.9132972438,-1.8833206328,3.3213418843<br/> Ti,0,-1.3196868487,-3.233476319,0.2240720471<br/> O,0,-2.3216699126,-1.7823914116,0.7699451354<br/> Ru,0,-1.0997924551,-0.3053757649,0.8731373251<br/> O,0,-1.3063207876,-0.1087605933,2.8162301356<br/> O,0,-0.4918032966,-3.926676924,1.4731721094<br/> H,0,1.4801322306,-2.0715856954,4.1358898106<br/> H,0,0.6357241796,-2.7260620746,2.8132578115<br/> H,0,0.1113247271,-1.2729250608,3.4947977075<br/> H,0,-2.2211859323,-0.295673642,3.0667488664</p>  | -1832.166173 |

|         |                                                                                                                                                                                                                                                                                                                                                                                                                                                                                                                                                                                                                                              |              |
|---------|----------------------------------------------------------------------------------------------------------------------------------------------------------------------------------------------------------------------------------------------------------------------------------------------------------------------------------------------------------------------------------------------------------------------------------------------------------------------------------------------------------------------------------------------------------------------------------------------------------------------------------------------|--------------|
| $^5I_6$ | O,0,0.1756901581,-3.1573425707,-0.7040561081<br>Ru,0,0.5752091294,-1.3416365538,-0.6274797561<br>Ru,0,0.1543550019,0.4381656135,-1.918322148<br>Ru,0,-1.4789212897,1.2783908559,-0.3515810918<br>Ru,0,0.6401932699,2.2861608041,-0.1628746534<br>Ru,0,1.7158829109,0.4041846339,0.8799614148<br>N,0,2.5141378188,0.4488348844,2.2664693245<br>Ti,0,-1.4147056239,-3.316554461,0.2950566832<br>O,0,-2.0640426686,-1.8795797407,1.2561040299<br>Ru,0,-0.8673502305,-0.3871385056,1.1307415484<br>O,0,-0.8811830465,-0.1327175031,3.0322535446<br>O,0,-2.5348008424,-4.3624145507,-0.2507818681<br>H,0,-1.5555535876,-0.7037699064,3.4290000801 | -1775.637438 |
| $^5T_6$ | O,0,0.2715957745,-3.267985084,-0.4598337332<br>Ru,0,0.5091973093,-1.4150052861,-0.353641002<br>Ru,0,-0.0497745371,0.2599947052,-1.7517537563<br>Ru,0,-1.4766872159,1.3296434431,0.0214970144<br>Ru,0,0.7140864477,2.0645689216,-0.2412070318<br>Ru,0,1.6028595178,0.3236111842,1.0841862738<br>N,0,1.6079119595,0.6443149666,2.7304075208<br>Ti,0,-1.5150033815,-3.2568400002,0.1341903231<br>O,0,-2.1787424165,-1.8406390166,1.1750628955<br>Ru,0,-0.9345847669,-0.4315739664,1.3781110984<br>O,0,-0.6310409663,-0.0936248836,3.0945945452<br>O,0,-2.5960235636,-3.8999377223,-0.8964305041<br>H,0,0.5687612791,0.2631820586,3.2724701563   | -1775.626483 |
| $^5I_7$ | O,0,0.2308516851,-3.0979111108,-0.3953777412<br>Ru,0,0.4428922584,-1.2535654301,-0.1589610854<br>Ru,0,-0.0230605274,0.3507587185,-1.6828465627<br>Ru,0,-1.5395957467,1.3861239582,-0.0977793791<br>Ru,0,0.672585376,2.1099826876,-0.0385170786<br>Ru,0,1.9535501255,0.3615140514,0.9395525956<br>N,0,1.9833794219,0.4515644028,2.65667484<br>Ti,0,-1.567569179,-3.2995933024,0.1106865579<br>O,0,-2.4734576358,-1.8962609019,0.9692912689<br>Ru,0,-1.2768359207,-0.495174713,1.3263464969<br>O,0,-0.9754781901,-0.0271827434,2.9236691308<br>O,0,-2.4776667315,-4.2852488241,-0.8041600275<br>H,0,1.1881004743,0.4668940073,3.3077975242     | -1775.638902 |
| $^5T_7$ | O,0,0.3238081933,-3.0092368018,-0.1119581561<br>Ru,0,0.4188554903,-1.1713948412,0.1904265972<br>Ru,0,-0.1909333218,0.3388538276,-1.4851233218<br>Ru,0,-1.6436561669,1.4200180605,-0.0184201662<br>Ru,0,0.7845542376,2.0960470614,-0.3203782195<br>Ru,0,1.6465067272,0.5605219284,1.2385906319<br>N,0,1.8128404031,0.8018819579,3.0421369754<br>Ti,0,-1.5423631093,-3.2785084261,0.0647394056<br>O,0,-2.685773,-1.9604500878,0.7352847013<br>Ru,0,-1.6140487202,-0.5217177265,1.3235031689<br>O,0,-1.4648534941,-0.136989743,2.9585420329                                                                                                     | -1776.787547 |

|                                  |                                                                                                                                                                                                                                                                                                                                                                                                                                                                                                                                                                                                                                                                                                                                     |              |
|----------------------------------|-------------------------------------------------------------------------------------------------------------------------------------------------------------------------------------------------------------------------------------------------------------------------------------------------------------------------------------------------------------------------------------------------------------------------------------------------------------------------------------------------------------------------------------------------------------------------------------------------------------------------------------------------------------------------------------------------------------------------------------|--------------|
|                                  | O,0,-2.2241307415,-4.2806005619,-1.0161505215<br>H,0,1.2804161884,0.1107961805,3.5897634125<br>H,0,3.2762582711,0.1020830806,1.2675415957<br>H,0,3.0020830427,0.1337730912,2.227962864                                                                                                                                                                                                                                                                                                                                                                                                                                                                                                                                              |              |
| <b><sup>5</sup>I<sub>g</sub></b> | O,0,0.1953276423,-3.0867600392,-0.244143852<br>Ru,0,0.4771310642,-1.2705003593,0.1096432917<br>Ru,0,-0.1578441947,0.2938048479,-1.5203043569<br>Ru,0,-1.4653615783,1.4425184017,-0.0231645827<br>Ru,0,1.0188971506,1.938767056,-0.2906400621<br>Ru,0,1.842838588,0.3023733144,1.0915321074<br>N,0,1.9593898736,0.4072686632,2.9728480505<br>Ti,0,-1.6593957883,-3.2589069535,0.0431401937<br>O,0,-2.6817308285,-1.8588638002,0.7444225437<br>Ru,0,-1.5020168487,-0.5069840804,1.3283954284<br>O,0,-1.2190673204,-0.1819703281,2.9606428764<br>O,0,-2.460788075,-4.3206377528,-0.8894943957<br>H,0,1.1912726337,0.0132665916,3.5112241329<br>H,0,3.2740951752,0.0869153325,0.4429086592<br>H,0,2.3668177666,1.204786386,3.4494493456 | -1776.870475 |
| <b><sup>5</sup>T<sub>g</sub></b> | O,0,0.1172484405,-3.1525183762,0.0067857755<br>Ru,0,0.3406300114,-1.2872498453,0.0823522353<br>Ru,0,0.1686175579,0.1511225748,-1.6534026231<br>Ru,0,-1.6940948078,1.2862846527,-0.6422132915<br>Ru,0,0.461162206,2.0233961038,0.0065411228<br>Ru,0,1.0371359014,0.4540971583,1.6046464187<br>N,0,2.5436342185,0.27005635,2.9577570221<br>Ti,0,-1.7494912394,-3.2927035339,0.0770806412<br>O,0,-2.8205479708,-1.827834723,0.5370921989<br>Ru,0,-1.7333389785,-0.3665469519,1.0267394374<br>O,0,-1.827520817,0.2414166069,2.6034130019<br>O,0,-2.4420277816,-4.4082717285,-0.8838919455<br>H,0,3.2733584163,-0.4291665499,2.9959954558<br>H,0,2.6728544375,0.4490414446,1.4935042034<br>H,0,2.8319454055,1.0939538177,3.4740603472    | -1776.829632 |
| <b><sup>5</sup>T<sub>g</sub></b> | O,0,-0.5343508773,-2.8789382255,-1.4419615628<br>Ti,0,-1.0830124965,-3.2171399352,0.2560582139<br>O,0,0.2036670117,-3.7181068722,1.2851923519<br>Ru,0,0.0635051216,-1.0507545743,-1.1508862319<br>Ru,0,-1.1902726865,-0.4489146897,0.8227097919<br>O,0,-2.2072811134,-2.0643265872,1.1087823608<br>Ru,0,1.2511295943,-0.5228810594,0.9378512366<br>N,0,1.5275813803,-1.8815897604,2.3308966529<br>N,0,1.9956055642,-1.9623578285,3.4700911778<br>Ru,0,1.3244609415,1.7168906732,0.4982232461<br>Ru,0,0.1049712974,1.146424211,-1.7668028016<br>Ru,0,-1.0662312807,1.7383043737,0.22941208<br>H,0,2.3432826731,-1.0426903571,3.7982010253<br>H,0,0.9347378704,-2.9425153685,1.8731644591                                             | -1755.738228 |
| <b><sup>5</sup>I<sub>g</sub></b> | O,0,-0.4243326289,-2.7025804635,-1.5979071518<br>Ti,0,-1.1946338991,-3.1296891316,0.0572901847                                                                                                                                                                                                                                                                                                                                                                                                                                                                                                                                                                                                                                      | -1755.743453 |

|                                               |
|-----------------------------------------------|
| O,0,-0.1381363328,-3.9327990942,1.0321117475  |
| Ru,0,0.144268953,-0.9515122619,-1.1905074815  |
| Ru,0,-1.1856897729,-0.3783822748,0.7429098154 |
| O,0,-2.2247293479,-1.9240517517,1.0503671466  |
| Ru,0,1.2459986873,-0.3892419584,0.9191786187  |
| N,0,1.5738000746,-1.8156560751,2.3178244061   |
| N,0,2.1011667778,-1.8652181824,3.4503008309   |
| Ru,0,1.2507618988,1.8451962898,0.3985249594   |
| Ru,0,0.0708305817,1.2303846565,-1.8575796482  |
| Ru,0,-1.153575807,1.792601796,0.0858140708    |
| H,0,2.5062470651,-0.943526803,3.6650494016    |
| H,0,1.1402087503,-2.7247847458,2.0635970997   |
